1 **Plant-associated *Pseudomonas aeruginosa* harbor multiple virulence traits essential for**  
2 **mammalian infection**

3

4 Sakthivel Ambreetha<sup>1,2</sup>, Ponnusamy Marimuthu<sup>1</sup>, Kalai Mathee<sup>2,3,\*</sup>, and Dananjeyan  
5 Balachandar<sup>1,\*</sup>

6

7 <sup>1</sup>Department of Agricultural Microbiology, Tamil Nadu Agricultural University, Coimbatore,  
8 Tamil Nadu, India.

9 <sup>2</sup>Department of Human and Molecular Genetics, Herbert Wertheim College of Medicine,  
10 Florida International University, Miami, FL, USA.

11 <sup>3</sup>Biomolecular Sciences Institute, Florida International University, Miami, FL, USA.

12

13 **\*Corresponding authors:**

14 Dananjeyan Balachandar and Kalai Mathee

15 Email address: [dbalu@tnau.ac.in](mailto:dbalu@tnau.ac.in) and [matheelabfor65roses@gmail.com](mailto:matheelabfor65roses@gmail.com)

16

17 **Running title**

18 Virulence profile of agricultural *P. aeruginosa* strains

## 19 **Summary**

20 *Pseudomonas aeruginosa* is a leading opportunistic pathogen capable of causing fatal  
21 infections in immunocompromised individuals and patients with degenerative lung  
22 diseases. Agricultural soil and plants are the vast reservoirs of this dreaded pathogen.  
23 However, there have been limited attempts to analyze the pathogenicity of *P.*  
24 *aeruginosa* strains associated with edible vegetable plants. This study aims to elucidate  
25 the virulence attributes of *P. aeruginosa* strains isolated from the rhizosphere and  
26 endophytic niches of cucumber, tomato, eggplant, and chili collected from  
27 agricultural fields. Virulence of the agricultural strains was compared to three previously  
28 characterized clinical isolates. Our results showed that 50% of the plant-associated  
29 strains formed significant levels of biofilm and exhibited swarming motility. Nearly 80% of  
30 these strains produced considerable levels of rhamnolipid and exhibited at least one  
31 type of lytic activity (hemolysis, proteolysis, and lipolysis). Their virulence was also  
32 assessed based on their ability to suppress the growth of plant pathogens  
33 (*Xanthomonas oryzae*, *Pythium aphanidermatum*, *Rhizoctonia solani*, and *Fusarium*  
34 *oxysporum*) and kill a select nematode (*Caenorhabditis elegans*). The plant-associated  
35 strains showed significantly higher virulence against the bacterial phytopathogen  
36 whereas the clinical strains had significantly higher antagonism against the fungal  
37 pathogens. In *C. elegans* slow-killing assay, the clinical strains caused 50-100% death  
38 while a maximum of 40% mortality was induced by the agricultural strains. This study  
39 demonstrates that some of the *P. aeruginosa* strains associated with edible plants  
40 harbor multiple virulence traits. Upon infection of humans or animals, these strains may  
41 evolve to be more pathogenic and pose a significant health hazard.

42

## 43 **Introduction**

44 *Pseudomonas aeruginosa* is a leading opportunistic pathogen that causes hospital-  
45 acquired, often fatal infections in immunocompromised individuals and patients with  
46 chronic pulmonary conditions (Reynolds et al., 1975; Von Graevenitz, 1977; Rosenthal et  
47 al., 2020). Additionally, this pathogen can manifest as a wide variety of infections, such  
48 as folliculitis, endocarditis, osteomyelitis, and sclerokeratitis, in healthy individuals  
49 (Radford et al., 2000; Tate et al., 2003; Doustdar et al., 2019). *P. aeruginosa*-associated  
50 mortality is a global concern in healthcare settings, which is why this bacterium is listed  
51 among the 'serious threat pathogens' (CDC AR, 2019; WHO News, 2019; PHE, 2020).

52  
53 *P. aeruginosa* is a well-known soil bacterium predominantly found in agricultural  
54 ecosystems (Clara, 1930; Elrod and Braun, 1942; Ali Siddiqui and Ehteshamul-Haque,  
55 2001; Adesemoye and Ugoji, 2009; Mondal et al., 2012; Gao et al., 2014; Yasmin et al.,  
56 2014; Radhapriya et al., 2015; Arif et al., 2016; Durairaj et al., 2017; Tiwari and Singh,  
57 2017; Gupta and Buch, 2019; Chandra et al., 2020). Few studies have argued that soil  
58 and plants are the primary sources for transmission of *P. aeruginosa* to humans (Green  
59 et al., 1974; Cho et al., 1975). Plant-associated *P. aeruginosa* first became a significant  
60 concern when its presence was detected in fresh vegetables in hospital kitchens,  
61 canteens, agricultural farms, retail markets, and supermarkets (Kominos et al., 1972;  
62 Wright et al., 1976; Correa et al., 1991; Viswanathan and Kaur, 2001; Curran et al., 2005;  
63 Allydice-Francis and Brown, 2012; Ambreetha et al., 2021).

64  
65 To date, very limited studies have demonstrated the inter-kingdom pathogenicity of *P.*  
66 *aeruginosa* strains. A clinical strain, *P. aeruginosa* PA14 isolated from a hospital burn

67 ward (Mathee, 2018), was reported to elicit extensive rotting in vegetable plants, such  
68 as cucumber, lettuce, potato, and tomato (Schroth et al., 1977; Schroth et al., 2018),  
69 and *Arabidopsis* (Rahme et al., 2000). *P. aeruginosa* strain BP35, isolated from a black  
70 pepper plant, is cytotoxic to mammalian A549 cells (Kumar et al., 2013). Clinical strains  
71 of *P. aeruginosa* release a multitude of virulence factors, such as pyocyanin,  
72 rhamnolipid, elastases, proteases, lipases, hemolysin, pyochelin, and pyoverdine. These  
73 assist the bacterium in establishing lethal infections (Balasubramanian et al., 2012;  
74 Moradali et al., 2017). However, there is a clear gap in testing the ability of plant-  
75 associated strains to produce the virulence factors required for human infection.

76  
77 In our previous study, we isolated the plant-associated *P. aeruginosa* strains (PPA01-  
78 PPA18) from edible vegetable plants (cucumber, tomato, chili, and eggplant) directly  
79 from farms in Southern India (Ambreetha et al., 2021). We reported that those PPA  
80 strains were evolutionarily related to the tested clinical isolates (ATCC10145, ATCC9027,  
81 and PAO1). Both the agricultural and clinical strains had comparable plant-beneficial  
82 traits, such as mineral solubilization, ammonification, extracellular release of indole-3  
83 acetic acid, and siderophore. These results triggered a quest to identify the virulence  
84 traits shared between agricultural and clinical *P. aeruginosa* strains. In our current  
85 study, we have tested the ability of the plant-associated strains to (1) release the  
86 virulence factors critical for human infection and (2) cause mortality in microbial  
87 systems and the animal model *Caenorhabditis elegans*.

88

## 89 **Results**

### 90 **Biofilm formation**

91 In clinical settings, biofilm-forming *P. aeruginosa* causes chronic pulmonary infections  
92 (Römling et al., 1994; Bjarnsholt et al., 2009). We hypothesized that *P. aeruginosa* strains  
93 in agricultural ecosystems can form biofilms. To test this hypothesis, biofilm formation by  
94 the *P. aeruginosa* PPA strains was estimated at three time points (24, 48, and 72 h) using  
95 crystal violet-microtiter assay (O'Toole, 2011) and presented as the biofilm to planktonic  
96 (B:P) ratio (Fig.1). The significance of the difference among the observed values was  
97 assessed using the one-way Analysis of Variance (ANOVA) and Duncan's Multiple  
98 Range Test (DMRT; strains that share the same letters do not differ significantly).  
99 ATCC9027, a slow biofilm former, showed low levels at 24h but gradually increased after  
100 48h and 72h of incubation. The well-characterized biofilm-forming strains, ATCC10145  
101 and PAO1, had a high B:P ratio at all three time points. Ten (cucumber: PPA01, PPA02,  
102 PPA04; tomato: PPA05, PPA07; eggplant: PPA11, PPA12; chili: PP15, PPA16, PPA18) out of  
103 the 18 PPA strains were weak biofilm producers, as evidenced by their B:P ratio of less  
104 than one. The cucumber and tomato endophytes, PPA03 and PPA08, produced  
105 biofilms comparable to the clinical strains, ATCC9027 and ATCC10145, respectively  
106 (indicated by the shared alphabets 'b' and 'c'). Among the plant isolates, the top  
107 three strains (PPA03/cucumber, PPA08/tomato, and PPA10/tomato) with a high biofilm  
108 population were all endophytes.

109

### 110 **Swarming motility**

111 Swarming motility is associated with the upregulation of multiple virulence factors in  
112 many flagellated bacteria, including *P. aeruginosa* (Overhage et al., 2008; Coleman et

113 al., 2020b; Coleman et al., 2020a). We hypothesized that the plant-associated *P.*  
114 *aeruginosa* strains could exhibit swarming motility. The ability to swarm was assessed  
115 using an M9 medium with 0.5% agar (Tremblay and Déziel, 2008). The swarming  
116 percentage was calculated based on triple recordings of the diameter of the bacterial  
117 tendrils extended on the plate surface. A non-swarming *P. chlororaphis* strain, ZSB15,  
118 was used as the negative control (Fig. 2A). The three positive controls, ATCC10145,  
119 ATCC9027, and PAO1, spread tendrils that covered more than 50% of the plate's area  
120 (Fig. 2B). All agricultural isolates exhibited swarming patterns at varying levels. The  
121 swarming phenotype of the tomato endophyte, PPA08, was significantly higher  
122 (covering 80% of the plate) than the tested positive controls, indicated by the letter 'a'  
123 (Fig.2A and B). Overall, four endophytes (PPA03/cucumber; PPA08, and PPA10/tomato;  
124 PPA16, and PPA18/chili), and two rhizospheric strains (PPA13, PPA14/eggplant) were the  
125 superior swimmers, swarming more than 50% of plate area. The rest of the strains  
126 (PPA01, PPA02, PPA04, and PPA05/cucumber; PPA06, PPA07, and PPA09/tomato;  
127 PPA11, and PPA12/eggplant; PPA15, and PPA17/chili) were weak swimmers. They  
128 covered less than 50% of the plate area.

129

### 130 **Extracellular release of rhamnolipid**

131 Rhamnolipids are a class of metabolites predominantly released by *P. aeruginosa* to  
132 infiltrate mammalian lung tissues (McClure and Schiller, 1992, 1996; Zulianello et al.,  
133 2006). In plants, rhamnolipids provide protection against pests and pathogens (Kim et  
134 al., 2011; Yan et al., 2015; Sancheti and Ju, 2019). In this study, the agricultural strains of  
135 *P. aeruginosa* were hypothesized to produce extracellular rhamnolipids. The test strains  
136 were qualitatively screened for their ability to release rhamnolipids on

137 cetyltrimethylammonium bromide (CTAB) agar plates (Fig. 3A). All *P. aeruginosa* strains  
138 formed blue halo zones around the wells, thus testing positive for rhamnolipid  
139 production (Fig. 3A).

140  
141 Quantitative assessment of extracellular rhamnolipids was performed using the  
142 gravimetric method (Zhang and Miller, 1992; Gunther et al., 2005). Rhamnolipid levels  
143 were expressed as  $\mu\text{g/ml}$  and the statistical significance was expressed through DMRT  
144 (Fig. 3B). Two of the three clinical strains, PAO1 and ATCC10145, released a high  
145 quantity of rhamnolipids. The clinical isolate ATCC9027 from otitis externa (Table 1)  
146 produced comparatively low rhamnolipid levels. All eighteen plant-associated strains  
147 released extracellular rhamnolipids. All strains except for the eggplant isolates (PPA11-  
148 PPA14) produced more rhamnolipids than ATCC 9027 (Fig. 3B).

149  
150 **Lytic activity**  
151 *P. aeruginosa* lytic enzymes deteriorate pulmonic health by causing vascular  
152 permeability, and organ damage (Ostroff et al., 1989; Wargo et al., 2011). We  
153 hypothesized that *P. aeruginosa* strains associated with agricultural plants harbor lytic  
154 activity. To confirm this, the hemolytic, proteolytic, and lipolytic activities of the strains  
155 were qualitatively assessed.

156  
157 **Hemolysis.** We tested the ability of the *P. aeruginosa* strains to lyse blood on sheep  
158 blood agar medium (Williams and Harper, 1947). Strains that partially lysed red blood  
159 cells and resulted in a green discoloration on the agar were scored positive for  $\alpha$ -  
160 hemolytic activity (Table 2). Strains that did not exhibit lytic behavior were marked as  $\gamma$ -

161 hemolytic. As expected, the three control strains, ATCC10145, ATCC9027, and PAO1,  
162 exhibited  $\alpha$ -hemolytic activity. More than 50% of the agricultural isolates exhibited  $\alpha$ -  
163 hemolysis, including four rhizospheric strains (PPA02 and PPA04/cucumber; PPA13, and  
164 PPA14/eggplant) and six endophytes (PPA03/cucumber; PPA07, PPA08, and  
165 PPA10/tomato; PPA11/eggplant; PPA16/chili). The remaining isolates did not exhibit  
166 any hemolytic activity.

167  
168 **Proteolysis.** *P. aeruginosa* associated lysis of the proteins casein and gelatin was tested  
169 by plate assay (Atlas, 1993; Georgescu et al., 2016) and presented as positive and  
170 negative scores (Table 2). Two of the three tested controls (ATCC10145 and PAO1)  
171 harbored high proteolytic activity. ATCC9027 caused mild lysis of gelatin but no lysis of  
172 casein. 16 out of 18 plant-associated strains showed caseinase activity whereas only 13  
173 strains had gelatinase activity. The rhizospheric strains (PPA01/cucumber and  
174 PPA09/tomato) were unable to hydrolyze either protein. Three other rhizospheric strains  
175 (PPA02/cucumber; PPA06/tomato; PPA12/eggplant) that displayed low caesinase  
176 activity did not exhibit gelatinase activity.

177  
178 **Lipolysis.** The lipid hydrolytic activity of the *P. aeruginosa* strains was tested in tributyrin  
179 agar medium (Atlas, 1993; Georgescu et al., 2016). Two of three control strains,  
180 ATCC10145 and PAO1, showed lipolytic behavior while ATCC9027 did not lyse the  
181 tested lipid (Table 2). Most plant-associated strains did not exhibit lipolysis except for  
182 three rhizospheric strains (PPA06/tomato, PPA13/eggplant, and PPA15/chili) and one  
183 endophyte (PPA07/tomato).

184



## 185 **Antagonism against phytopathogens**

186 Agricultural *P. aeruginosa* strains have been previously shown to inhibit other  
187 phytopathogens (Ali Siddiqui and Ehteshamul-Haque, 2001; Yasmin et al., 2014; Durairaj  
188 et al., 2017). This study hypothesized that both agricultural and clinical *P. aeruginosa*  
189 exhibit virulence against plant pathogens. To test this hypothesis, we challenged the *P.*  
190 *aeruginosa* strains with common fungal (*Pythium aphanidermatum*, *Rhizoctonia solani*,  
191 and *Fusarium oxysporum*) and bacterial (*Xanthomonas oryzae*) phytopathogens  
192 (Sakthivel and Gnanamanickam, 1986). This is the first known attempt to test the  
193 antagonism of clinical strains against phytopathogens. Inhibition of phytopathogens  
194 caused by the *P. aeruginosa* strains was normalized to PAO1 (Fig. 4).

195  
196 ***Pythium aphanidermatum* inhibition.** All tested strains could inhibit *Pythium*  
197 *aphanidermatum* (Fig. 4A). Ten plant-associated strains (PPA03/cucumber; PPA07,  
198 PAA08, and PPA10/tomato; PPA13, and PPA14/eggplant; PPA15-PPA18/chili) and two  
199 clinical strains (ATCC10145 and ATCC9027) showed higher antagonism when  
200 compared to PAO1. However, only four PPA strains (PPA03/cucumber; PPA07, and  
201 PPA08/tomato; PPA15/chili) were significantly more antagonistic than PAO1 ( $p < 0.05$ ,  
202 DMRT). The remaining strains (7 of 18) from cucumber, tomato, and eggplant inhibited  
203 *Pythium aphanidermatum* significantly less as compared to PAO1.

204  
205 ***R. solani* inhibition.** All tested strains could inhibit *R. solani* (Fig. 4B). Eight plant-  
206 associated strains (PPA03/cucumber; PAA08, and PPA10/tomato; PPA14/eggplant;  
207 PPA15-PPA18/chili) and two clinical strains (ATCC10145 and ATCC9027) showed higher  
208 antagonism when compared to PAO1. Among them, six PPA strains (PPA03/cucumber;

209 PPA08, and PPA10/tomato; PPA15, PPA16, and PPA18/chili) significantly inhibited *R.*  
210 *solani* more than PAO1 ( $p < 0.05$ , DMRT). The other *P. aeruginosa* strains (9 of 18) from  
211 cucumber, tomato, and eggplant caused significantly lower inhibition of *R. solani* than  
212 PAO1.

213  
214 **F. oxysporum inhibition.** All tested strains inhibited *F. oxysporum* (Fig. 4C). Five plant-  
215 associated strains (PPA03/cucumber; PPA08, and PPA10/tomato; PPA16, and  
216 PPA18/chili) and one clinical strain (ATCC10145) showed higher antagonism when  
217 compared to PAO1. Among them, four PPA strains (PPA03/cucumber; PPA10/tomato;  
218 PPA16 and PPA18/chili) caused significantly higher inhibition than PAO1 ( $p < 0.05$ , DMRT).  
219 The rest of the *P. aeruginosa* PPA strains (13 out of 18) from cucumber, tomato,  
220 eggplant, and chili were significantly less antagonistic against *F. oxysporum* when  
221 compared to PAO1.

222  
223 **X. oryzae inhibition.** All tested strains could inhibit *X. oryzae* (Fig. 4C). Most of the plant-  
224 associated strains (16 out of 18) showed higher antagonism when compared to PAO1.  
225 Among them, 12 PPA strains (PPA01, PPA03, and PPA04/cucumber; PPA07, PPA08, and  
226 PPA10/tomato; PPA13 and PPA14/eggplant; PPA15-PPA18/chili) caused significantly  
227 higher inhibition than PAO1 ( $p < 0.05$ , DMRT). Two rhizospheric strains (PPA06, and  
228 PPA09/tomato) had comparatively lower antagonism of *X. oryzae* than PAO1.

229  
230 **Clustering based on antagonistic potential.** Euclidean distance-based principal  
231 coordinate analysis (PCoA) (NCSS, Kaysville, USA) clustered the *P. aeruginosa* strains  
232 based on their combined antagonism against the phytopathogens (Fig. 5). The clinical

233 strains (PAO1, ATCC10145, and ATCC9027) did not cluster with the PPA strains. The PPA  
234 strains formed three clusters except for a chili endophyte (PPA16) and tomato  
235 rhizospheric strain (PPA09). Cluster A was occupied by three tomato isolates: one from  
236 the rhizosphere niche (PPA06) and two endophytes (PPA05 and PPA07). Cluster B  
237 contained five endophytes and four rhizosphere strains from all four plants. Cluster C  
238 contained four strains isolated from the eggplant and cucumber. Two rhizospheric  
239 strains (PPA01 and PPA02) isolated from the cucumber superimposed on each other in  
240 cluster C, which reflects their identical antagonism.

241

#### 242 **Virulence in the animal model, *Caenorhabditis elegans***

243 The nematode *C. elegans* has been extensively used as a model system to understand  
244 the pathogenicity of *P. aeruginosa* (Mahajan-Miklos et al., 1999; Adonizio et al., 2008).  
245 In this study, we hypothesized that the agricultural *P. aeruginosa* strains were capable  
246 of killing the *C. elegans* worms. This hypothesis was tested through the *C. elegans* slow  
247 killing assay (Tan et al., 1999). The nematodes were scored alive or dead (Fig. 6A)  
248 based on their response to physical stimuli. The percentage of living nematodes after  
249 feeding on the *P. aeruginosa* strains was noted every 24 h until 120 h of incubation (Fig.  
250 6B). As expected, the negative control, *E. coli* OP50, did not induce mortality in the  
251 worms (Fig. 6A). However, at 120 h nearly 8% of the worms died on OP50 plates due to  
252 natural death (Fig. 6B). The three positive controls, ATCC10145, ATCC9027, and PAO1,  
253 caused higher mortality than the plant-associated strains. All of the nematodes fed  
254 with ATCC10145 and PAO1 were dead within 72 and 120 h, respectively. In contrast,  
255 only 50% of the worms died after feeding with ATCC9027. Most of the plant-associated  
256 strains were less virulent against *C. elegans*. Three endophytic strains from cucumber

257 (PPA03), tomato (PPA08), and chili (PPA18) plants caused maximum mortality of 40%.  
258 Only 15% of worms died after feeding on certain rhizospheric (PPA06/tomato;  
259 PPA14/eggplant) and endophytic strains (PPA05, and PPA07/tomato). These four strains  
260 were the least virulent among the agricultural isolates.

261

262

## 263 **Discussion**

264 In the 1970s, agricultural soil and plants were recognized as reservoirs of the  
265 opportunistic pathogen *P. aeruginosa* (Green et al., 1974; Cho et al., 1975). Since, *P.*  
266 *aeruginosa* has been detected in fresh agricultural produce at markets, hospital  
267 kitchens, and local vendors (Kominos et al., 1972; Wright et al., 1976; Correa et al., 1991;  
268 Viswanathan and Kaur, 2001; Allydice-Francis and Brown, 2012; Nithya and Babu, 2017).  
269 Despite these reports, there have been minimal attempts to characterize the  
270 pathogenicity of the plant-associated *P. aeruginosa* strains (Lebeda et al., 1984; Kumar  
271 et al., 2013). Our previous study demonstrated that *P. aeruginosa* strains (PPA01 to  
272 PPA18) present in the endophytic and rhizospheric niches of cucumber, tomato,  
273 eggplant, and chili produce two virulence factors, pyocyanin, and siderophores  
274 (Ambreetha et al., 2021). Our current work extends our previous findings by  
275 characterizing the pathogenic phenotypes of those strains. Specifically, we assessed  
276 their ability to swarm, form biofilms, produce virulence factors, and kill other microbes  
277 and a select nematode.

278

### 279 **Vegetable-associated *P. aeruginosa* strains harbor multiple virulence traits**

280 The *P. aeruginosa* strains tested in this study harbored an arsenal of virulence attributes.  
281 These include biofilm formation, swarming motility, rhamnolipid production, and lytic  
282 activity (hemolysis, proteolysis, and lipolysis).

283 **Biofilm.** Three endophytic (PPA03/cucumber, PPA08/tomato, PPA10/tomato),  
284 and two rhizospheric strains (PPA13/eggplant, and PPA14/eggplant) produced high  
285 levels of biofilm (Fig. 1). In agricultural plants, such as soybean, mung bean, sorghum,  
286 and tomato, biofilm-forming *P. aeruginosa* alleviates abiotic stress and enhances plant

287 growth (Ali et al., 2009; Tank and Saraf, 2010; Sarma and Saikia, 2014; Kumawat et al.,  
288 2019). In the clinical setting, biofilm-forming *P. aeruginosa* is a dreaded pathogen and  
289 accounts for significant mortality in patients with critical pulmonary conditions (Römling  
290 et al., 1994; Singh et al., 2000; Nixon et al., 2001; Bjarnsholt et al., 2009). This is the first  
291 report to show that the endophytic *P. aeruginosa* strains present in cucumber (PPA03)  
292 and tomato (PPA08) can form biofilms comparable to clinical strains (Fig.1).

293       **Swarming motility.** There are no previous reports on the ability of plant-  
294 associated *P. aeruginosa* strains to swarm. In this study, four endophytic *P. aeruginosa*  
295 strains (PPA08, PPA10/tomato; PPA16, PPA18/chili) showed extensive swarming (Fig. 2).  
296 The tendril tip of the swarming bacteria possesses mobile cells that can quickly spread  
297 over any surface (Tremblay and Déziel, 2010). In the murine model system, it has been  
298 demonstrated that pathogenic *P. aeruginosa* swarms to disseminate in the host  
299 (Coleman et al., 2020a). Previous reports on clinical strains suggested that swarming  
300 motility might be associated with the expression of virulence factors (Overhage et al.,  
301 2008; Coleman et al., 2020b). In our study, the four superior swarmers exhibited lytic  
302 activity ( $\alpha$ -hemolysis, proteolysis, and lipolysis) and comparatively higher antagonism  
303 against phytopathogens (Fig. 2, 4; Table 2).

304       **Lytic activity.** There were no previous reports on the hemolytic, proteolytic, or  
305 lipolytic capability of plant-associated *P. aeruginosa*. In this study, 10 of the 18 plant-  
306 associated strains exhibited  $\alpha$ -hemolytic activity (Table 2). Hemolysin is an extracellular  
307 toxin produced by pathogenic bacteria to lyse host erythrocytes thereby facilitating  
308 tissue invasion (Goebel et al., 1988). Previous studies have demonstrated that in human  
309 infection, *P. aeruginosa* releases hemolysins to alter host lung physiology. This in part  
310 accounts for the serious morbidity and mortality associated with this bacterium (Darby

311 et al., 1999; Wargo et al., 2011). In addition, *P. aeruginosa* extracellular lipase and  
312 protease disrupt cell membrane integrity and inactivate immune components (Heck et  
313 al., 1986; Parmely et al., 1990; König et al., 1996; Barker et al., 2004; Pinna et al., 2008). In  
314 our current study, 13 *P. aeruginosa* PPA strains exhibited protease activity; four of which  
315 also had lipase activity (Table 2).

316 **Rhamnolipid.** Both the clinical and agricultural strains of *P. aeruginosa* studied  
317 released rhamnolipid (Fig. 3). Previous clinical studies have suggested that *P.*  
318 *aeruginosa* rhamnolipids alter the respiratory epithelium facilitating lung infiltration  
319 (McClure and Schiller, 1996; Zulianello et al., 2006). However, in the agricultural  
320 ecosystem, rhamnolipids produced from *P. aeruginosa* protect the host plant against  
321 fungal pathogens (Oomycetes, Ascomycota, and Zygomycetes) and green peach  
322 aphid (Kim et al., 2000; Kim et al., 2011; Yan et al., 2015; Sancheti and Ju, 2019). In the  
323 current study, we have observed that the clinical strains PAO1 and ATCC10145 are the  
324 superior rhamnolipid producers (Fig. 3B). ATCC9027 has been previously reported as a  
325 low rhamnolipid producer (Grosso-Becerra et al., 2016). In this study, 50% of the PPA  
326 strains had higher levels when compared to ATCC9027.

327

### 328 ***P. aeruginosa* exhibits antagonism against phytopathogens**

329 *Pythium aphanidermatum*, *R. solani*, and *F. oxysporum* are globally distributed fungal  
330 pathogens that cause rotting, blight, and wilt, respectively, in many plant species  
331 (Parmeter, 1970; Martin and Loper, 1999; Michielse and Rep, 2009; Lodhi et al., 2013). *X.*  
332 *oryzae* is a devastating rice pathogen that causes bacterial leaf blight (Swings et al.,  
333 1990). Previous reports have described that *P. aeruginosa* in agricultural ecosystems  
334 indirectly contributes to plant growth by inhibiting these harmful pathogens (Ali Siddiqui

335 and Ehteshamul-Haque, 2001; Yasmin et al., 2014; Durairaj et al., 2017). The three  
336 control isolates of human origin, PAO1, ATCC10145, and ATCC9027, have never  
337 previously been tested for their ability to inhibit phytopathogens. Our current work  
338 demonstrates that both clinical and agricultural *P. aeruginosa* strains antagonize the  
339 tested fungal and bacterial phytopathogens (Fig. 4 and 5). This is unsurprising  
340 considering the number of virulence factors harbored by these strains (Fig. 1 to 3; Table  
341 2). The secondary metabolites, pyocyanin and rhamnolipid, are implicated as the  
342 major determinants of *P. aeruginosa* antagonism (Kim et al., 2011; Sudhakar et al., 2015;  
343 Mahmoud et al., 2016; Chen et al., 2017; DeBritto et al., 2020). The strains tested in this  
344 study produced both pyocyanin and rhamnolipids (Fig. 3; Ambreetha et al., 2021)  
345 which might have contributed to anti-microbial virulence (Fig.4 and 5). Compared to  
346 PAO1, nearly 90% of the plant-associated strains had higher antagonism against the  
347 bacterial pathogen (Fig. 4D). In fungal system, the clinical strains had significantly  
348 higher virulence than most of the plant-associated strains (Fig. 4A to C). We suggest  
349 using the phytopathogenic fungi as a simple eukaryotic model system to test *P.*  
350 *aeruginosa* pathogenicity.

351

### 352 **Vegetable-associated *P. aeruginosa* induces mortality in *C. elegans***

353 The pathogenicity of *P. aeruginosa* in mammals is often assessed based on its lethality  
354 against *C. elegans* (Mahajan-Miklos et al., 1999; Tan et al., 1999). Virulent strains of *P.*  
355 *aeruginosa* accumulate in the nematode's gut and slowly cause death (Tan et al.,  
356 1999; Kirienco et al., 2014). However, the non-pathogenic bacteria do not hinder the  
357 growth and development of *C. elegans* (Andrew and Nicholas, 1976). In this  
358 investigation, nematode mortality caused by the agricultural strains was considerably



359 lower when compared to the clinical isolates. The most virulent agricultural strains  
360 (PPA03/cucumber; PPA08, and PPA10/tomato; PPA13, and PPA14/eggplant; PPA16,  
361 and PPA18/chili) induced mortality in 30-40% of the nematode population (Fig. 6).  
362 Despite the multiple virulence factors observed in the plant-associated strains, the  
363 mortality of *C. elegans* was higher (50-100%) when fed with clinical strains. The reduced  
364 virulence of the plant-associated *P. aeruginosa* strains suggests that the clinical isolates  
365 might have evolved to be more pathogenic to survive within the eukaryotic system.  
366 Pathoadaptive assays would reveal if these plant-associated strains can evolve into a  
367 more pathogenic form under the right conditions.

368

## 369 **Conclusion**

370 To date, many studies have characterized the destructive virulence factors of human-  
371 associated, animal-associated, and environmental *P. aeruginosa* strains (Jaffar-Bandjee  
372 et al., 1995; Alonso et al., 1999; Vives-Flórez and Garnica, 2006; Zulianello et al., 2006;  
373 Balasubramanian et al., 2012; Hall et al., 2016; Moradali et al., 2017; Ruiz-Roldán et al.,  
374 2020). However, limited studies have demonstrated the ability of agricultural *P.*  
375 *aeruginosa* strains to infect animals and humans (Lebeda et al., 1984; Kumar et al.,  
376 2013). In this investigation, we have shown the presence of extremely virulent and lowly  
377 virulent *P. aeruginosa* strains in the rhizospheric and endophytic niches of four  
378 vegetables (cucumber, tomato, eggplant, and chili). Virulence was not correlated  
379 with the respective niche. The less virulent strains may be long-time soil dwellers and the  
380 extensively virulent strains might be human- or animal-adapted ones that got recently  
381 introduced into the agricultural ecosystem. These virulent strains may have entered the  
382 agricultural ecosystem through animal excreta or irrigation water with run-offs from

383 nearby sewage systems (Wheater et al., 1980; Mavrodi et al., 2012; Slekovec et al., 2012;  
384 Orlofsky et al., 2016). Comparative genomic analyses will reveal the molecular  
385 adaptations contributing to the variation(s) among the agricultural strains. In the future,  
386 the pathoadaptive ability of the avirulent strains should be tested to find out if they  
387 could evolve into pathogens under selective conditions. Overall, this study reveals that  
388 agricultural plants harvested directly from soil could be a potential source for  
389 transmission of *P. aeruginosa* to humans. Farmworkers and consumers face risk of *P.*  
390 *aeruginosa* related infections, which are lethal in vulnerable individuals. To the best of  
391 our knowledge, this study is the first comprehensive attempt to show that *P. aeruginosa*  
392 strains residing within the internal tissues and rhizosphere of edible vegetables harbor  
393 multiple virulence factors critical for human infection.

394

## 395 **Experimental Procedures**

### 396 **Bacterial strains and culture conditions**

397 Plant-associated *P. aeruginosa* strains isolated and characterized in our previous study  
398 were used as test strains (Ambreetha et al., 2021). Clinical strains of *P. aeruginosa*,  
399 PAO1, ATCC10145, and ATCC9027 were used as controls (Table 1). All *P. aeruginosa*  
400 strains were periodically sub-cultured and grown in Pseudomonas agar (for pyocyanin)  
401 medium (PAP, Himedia) at 37°C. A plant pathogenic bacterium, *Xanthomonas oryzae*,  
402 was cultured in a nutrient agar medium at 37°C. Plant pathogenic fungi, *Pythium*  
403 *aphanidermatum*, *Rhizoctonia solani*, and *Fusarium oxysporum* were cultured in potato  
404 dextrose agar medium at 37°C.

405

### 406 **Nematode strain and culture conditions**

407 *Caenorhabditis elegans* N2 hermaphrodite strain was used in this study (Brenner, 1974).  
408 The worms were periodically cultured in nematode growth medium (NGM), overlaid  
409 with *Escherichia coli* strain OP50, and maintained at 20°C (Brenner, 1974).

410

### 411 **Biofilm production**

412 *In vitro* biofilm production by the *P. aeruginosa* strains was quantified using microtiter  
413 assay (O'Toole, 2011). Overnight cultures of the *P. aeruginosa* strains (25 µl, OD<sub>660</sub>~0.5)  
414 were inoculated into microtitre wells containing 225 µl of LB broth. Three sets of  
415 microtitre plates were inoculated and incubated for three different time intervals (24,  
416 48, and 72 hours). After the incubation period, planktonic cells were transferred to a  
417 new microtitre plate and A<sub>660</sub> was measured (Spectramax® i3x, USA). Biofilms stuck to the  
418 plates were washed twice with sterile H<sub>2</sub>O and flushed with 0.1 % of crystal violet. The

419 plates were incubated for 10-15 minutes at room temperature and gently washed  
420 twice with sterile H<sub>2</sub>O. The stained plates were allowed to dry overnight at room  
421 temperature. The next day, 30% acetic acid was added to the well to dissolve the  
422 biofilms, and absorbance was measured @ 550 nm. The ratio between the biofilm and  
423 planktonic populations was determined at three time points (24, 48, and 72 h; O'Toole,  
424 2011). The experiment was repeated thrice and the results were represented as the  
425 biofilm to planktonic ratio.

426

### 427 **Swarming motility**

428 Swarming motility of the *P. aeruginosa* strains was assessed by adding 10 µl of 24 h-old  
429 test strains (OD<sub>660</sub> ~ 0.5) on modified M9 plates with 0.5% agar (Tremblay and Déziel,  
430 2008). The diameter of the bacterial tendrils extended on the plates due to swarming  
431 was measured, and the percentage of plates swarmed within 48 h of incubation was  
432 estimated (Tremblay and Déziel, 2008). The experiment was repeated thrice and three  
433 different diameters were measured every time. Results were represented as the  
434 percentage of the plate area swarmed in 48 h.

435

### 436 **Rhamnolipid**

437 **Qualitative assay.** A CTAB agar test was done to qualitatively assess the *P. aeruginosa*  
438 strains for rhamnolipid production (Siegmond and Wagner, 1991). In brief, the culture  
439 supernatants of the test strains were filtered using 0.45 µm filters. Ten microliters of the  
440 cell-free extracts were added to 0.2 cm wells on CTAB-methylene blue agar plates and  
441 incubated at 37°C for 24 h. If rhamnolipid (anionic surfactant) was present in the  
442 supernatant, it reacted with the CTAB (cationic surfactant), resulting in an insoluble

443 complex. The strains were scored positive based on the formation of a dark blue  
444 precipitated zone around the culture wells. The experiment was repeated thrice to  
445 confirm result consistency.

446  
447 **Quantitative assay.** The strains were grown in phosphate limited protease peptone  
448 ammonium salts (PPGAS) broth supplemented with 2% (v/v) sunflower oil at 37°C to  
449 induce rhamnolipid production for seven days (Zhang and Miller, 1992). We used the  
450 chloroform-methanol extraction method for rhamnolipid separation (Zhang and Miller,  
451 1992). In brief, the cell-free culture supernatant was acidified to pH2 with 12 M  
452 hydrochloric acid. The lipids were extracted using a chloroform-methanol (2:1) mixture  
453 and concentrated through evaporation. Concentrated rhamnolipids were  
454 gravimetrically quantified (Gunther et al., 2005). The experiment was repeated thrice  
455 and results were presented as µg/ml of the culture supernatant.

456  
457 **Lytic activity**

458 **Hemolysis.** The ability of the *P. aeruginosa* strains to lyse blood cells was assessed by  
459 streaking the overnight cultures (OD<sub>660</sub> ~ 0.5) on nutrient agar plates containing 5%  
460 sheep blood (Williams and Harper, 1947). The plates were incubated for 24 h at 37°C.  
461 Green discoloration of the blood with a mild halo zone was noted as α-hemolysis, and  
462 the absence of lytic activity was noted as γ-hemolysis. The experiment was repeated  
463 thrice for consistency.

464  
465 **Lipolysis and proteolysis.** The lipolytic activity of the *P. aeruginosa* strains was assayed  
466 using 1% tributyrin as a substrate (Atlas, 1993; Georgescu et al., 2016). Strains were

467 considered positive for lipolytic activity if an opaque precipitate formed around the  
468 bacterial colonies. The proteolytic behavior of the strains was assayed using 3% skim  
469 milk and 3% gelatin (1;1 ratio) as the substrates (caseinase, and gelatinase activity,  
470 respectively). Formation of halo zones around the colonies were indicative of casein  
471 proteolysis and gelatin hydrolysis (Atlas, 1993; Georgescu et al., 2016). The strains were  
472 scored based on the intensity of lysis (mild lysis, heavy lysis, or no lysis). The experiment  
473 was repeated thrice for consistency.

474

#### 475 **Antagonistic activity**

476 **Antifungal antagonism.** The antagonistic potential of the *P. aeruginosa* strains against  
477 three phytopathogenic fungi (*Pythium aphanidermatum*, *R. solani*, and *F. oxysporum*)  
478 was assessed by dual-culture assay (Sakthivel and Gnanamanickam, 1986). In brief,  
479 fungal discs were placed on one corner of potato dextrose agar medium in 90 mm  
480 Petri plates. *P. aeruginosa* strains were streaked 3 cm away from the fungal disc. Plates  
481 were incubated @ 37°C for seven days. Inhibition in mycelial growth, as influenced by  
482 the *P. aeruginosa* strains, was recorded. The percentage inhibition was estimated  
483 based on the standard formula,  $\frac{D_c - D_t}{D_c} \times 100$ , where  $D_c$  is the diameter of the fungal  
484 mycelium in the control plate and  $D_t$  is the diameter of the fungal mycelium as  
485 influenced by the test strains (Riungu et al., 2008). The experiment was repeated thrice  
486 for consistency.

487

488 **Antibacterial antagonism.** Antibacterial effect of the test strains against *Xanthomonas*  
489 *oryzae* pv. *oryzae* was estimated by cross streak assay (Lertcanawanichakul and  
490 Sawangnop, 2011). In brief, *P. aeruginosa* strains were streaked at the center of nutrient

491 agar plates and incubated for 24 hrs. After 24 hours, *X. oryzae* was streaked  
492 perpendicular to the central streak and the plates were incubated for another 24 hrs  
493 @37°C. Inability of the target pathogen to grow in the confluence area was recorded  
494 after incubation. The percentage inhibition of *X. oryzae*, as influenced by the *P.*  
495 *aeruginosa* strains, was calculated based on the standard formula,  $\frac{L_c - L_t}{L_c} \times 100$ , where  $L_c$   
496 is the length of the *X. oryzae* grown in the control plate and  $L_t$  is the length of the *X.*  
497 *oryzae* as influenced by the test strains (Lo Giudice et al., 2007). The experiment was  
498 repeated thrice for consistency.

499

### 500 **C. elegans killing assay**

501 The ability of the *P. aeruginosa* strains to induce death in *C. elegans* was demonstrated  
502 via a slow-killing assay (Tan et al., 1999). *C. elegans* gravid adults were treated with 1N  
503 NaOH and 5% sodium hypochlorite (1:1) solution (Brenner, 1974). The eggs were  
504 allowed to hatch in M9 buffer, and 24 h later the emerged L1-worms were released  
505 over a lawn of *E. coli* OP50 (Brenner, 1974; Adonizio et al., 2008). These synchronized L1-  
506 worms were grown up to the L4-stage. We prepared slow-killing plates with NGM (Tan  
507 et al., 1999) seeded with overnight cultures ( $OD_{660} \sim 0.5$ ) of OP50, PPA strains, and  
508 clinical strains of *P. aeruginosa*. The plates were incubated at 37°C for 24 h. The L4-  
509 worms (20 per plate) were introduced into these plates and incubated at 20°C  
510 (Brenner, 1974). The viability of the nematodes, as influenced by the tested bacterial  
511 strains, was recorded every 24 h for five consecutive days. Worms that did not respond  
512 to physical stimuli were scored as dead. The death of worms on the OP50 plate was  
513 scored as natural mortality (negative control). The experiment was repeated thrice for  
514 consistency.

## 515 **Statistics and reproducibility**

516 All experiments were performed in triplicates. All data were subjected to a one-way  
517 analysis of variance (ANOVA) with a P-value of 0.05, and Duncan's multiple range test  
518 was performed between individual means to reveal any significant difference (XLSTAT,  
519 version 2010.5.05 add-in with Windows Excel). Principal coordinate analysis (PCoA)  
520 based on Euclidean distance was carried out using NCSS 2020 statistical software  
521 (NCSS, Kaysville, USA) to cluster the *P. aeruginosa* strains based on their antagonism  
522 against phytopathogens. Data analysis and scientific graphing were done in OriginPro  
523 version 8.5 (OriginLab®, USA).

524

## 525 **Acknowledgment**

526 No grant supported this work. SA was partially funded by the Fulbright Doctoral Nehru  
527 Research Fellowship by the U.S Department of State's Bureau of Educational and  
528 Cultural Affairs and United-States India Educational Foundation (ID. PS00299273). SA also  
529 received Science and Engineering Research Board-International Travel Support funded  
530 by the Department of Science and Technology, India (No: ITS\_2019\_002449). We thank  
531 Dr. Sriyutha Murthy (Indira Gandhi Centre for Atomic Research, Kalpakkam, Tamilnadu,  
532 India) for providing *P. aeruginosa* strain PAO1 and Dr. Kavitha Babu (Department of  
533 Biological Sciences, Indian Institute of Science Education and Research, Mohali) for  
534 providing the *C. elegans* nematode.

535

## 536 **Author Contributions**

537 The experiments were conceived and designed by SA and DB. The samples were  
538 processed by SA and PM. The experiments were performed by SA. Critical analyses of



539 the data were done by SA, KM, and DB. The manuscript was prepared by SA and KM.

540 Finally, all authors were involved in the critical review of this paper.

541

542 **Ethical Approval** - There were no human or animal subjects involved in this study.

543

544 **Conflict of Interest** - The authors declare no conflict of interest.

545

546 **Data Availability**

547 All sequence data generated in this study were deposited in NCBI GenBank (Accession

548 no. MT734694 to MT734711).

549

## 550 References

- 551 Adesemoye, A.O., and Ugoji, E.O. (2009) Evaluating *Pseudomonas aeruginosa* as plant  
552 growth-promoting rhizobacteria in West Africa. *Arch Phytopathol Plant Protect*  
553 **42**: 188-200.
- 554 Adonizio, A., Kong, K.-F., and Mathee, K. (2008) Inhibition of quorum sensing-controlled  
555 virulence factor production in *Pseudomonas aeruginosa* by South Florida plant  
556 extracts. *Antimicrob Agents Chemother* **52**: 198-203.
- 557 Ali Siddiqui, I., and Ehteshamul-Haque, S. (2001) Suppression of the root rot–root knot  
558 disease complex by *Pseudomonas aeruginosa* in tomato: The influence of  
559 inoculum density, nematode populations, moisture and other plant-associated  
560 bacteria. *Plant Soil* **237**: 81-89.
- 561 Ali, S.Z., Sandhya, V., Grover, M., Kishore, N., Rao, L.V., and Venkateswarlu, B. (2009)  
562 *Pseudomonas* sp. strain AKM-P6 enhances tolerance of sorghum seedlings to  
563 elevated temperatures. *Biol Fert Soils* **46**: 45-55.
- 564 Allydice-Francis, K., and Brown, P.D. (2012) Diversity of antimicrobial resistance and  
565 virulence determinants in *Pseudomonas aeruginosa* associated with fresh  
566 vegetables. *Int J Microbiol* **2012**: 426241.
- 567 Alonso, A., Rojo, F., and Martínez, J.L. (1999) Environmental and clinical isolates of  
568 *Pseudomonas aeruginosa* show pathogenic and biodegradative properties  
569 irrespective of their origin. *Environ Microbiol* **1**: 421-430.
- 570 Ambreetha, S., Marimuthu, P., Mathee, K., and Balachandar, D. (2021) Rhizospheric and  
571 endophytic *Pseudomonas aeruginosa* in edible vegetable plants share  
572 molecular and metabolic traits with clinical isolates. *bioRxiv*:  
573 2021.2006.2011.448042.
- 574 Andrew, P.A., and Nicholas, W.L. (1976) Effect of bacteria on dispersal of  
575 *Caenorhabditis elegans* (Rhabditidae). *Nematologica* **22**: 451-461.
- 576 Arif, M.S., Riaz, M., Shahzad, S.M., Yasmeen, T., Akhtar, M.J., Riaz, M.A. et al. (2016)  
577 Associative interplay of plant growth promoting rhizobacteria (*Pseudomonas*  
578 *aeruginosa* QS40) with nitrogen fertilizers improves sunflower (*Helianthus annuus*  
579 L.) productivity and fertility of aridisol. *Appl Soil Ecol* **108**: 238-247.
- 580 Atlas, R.M. (1993) *Handbook of Microbiological Media*: CRC press, Lawrence Parks,  
581 London.
- 582 Balasubramanian, D., Schneper, L., Kumari, H., and Mathee, K. (2012) A dynamic and  
583 intricate regulatory network determines *Pseudomonas aeruginosa* virulence.  
584 *Nucleic Acids Res* **41**: 1-20.
- 585 Barker, A.P., Vasil, A.I., Filloux, A., Ball, G., Wilderman, P.J., and Vasil, M.L. (2004) A novel  
586 extracellular phospholipase C of *Pseudomonas aeruginosa* is required for  
587 phospholipid chemotaxis. *Mol Microbiol* **53**: 1089-1098.
- 588 Bjarnsholt, T., Jensen, P.O., Fiandaca, M.J., Pedersen, J., Hansen, C.R., Andersen, C.B. et  
589 al. (2009) *Pseudomonas aeruginosa* biofilms in the respiratory tract of cystic  
590 fibrosis patients. *Pediatr Pulmonol* **44**: 547-558.
- 591 Brenner, S. (1974) The genetics of *Caenorhabditis elegans*. *Genetics* **77**: 71-94.
- 592 Chandra, H., Kumari, P., Bisht, R., Prasad, R., and Yadav, S. (2020) Plant growth  
593 promoting *Pseudomonas aeruginosa* from *Valeriana wallichii* displays  
594 antagonistic potential against three phytopathogenic fungi. *Mol Biol Rep* **47**:  
595 6015-6026.

- 596 Chen, J., Wu, Q., Hua, Y., Chen, J., Zhang, H., and Wang, H. (2017) Potential  
597 applications of biosurfactant rhamnolipids in agriculture and biomedicine. *Appl*  
598 *Microbiol Biotechnol* **101**: 8309-8319.
- 599 Cho, J., JJ, C., and SD, K. (1975) Ornamental plants as carriers of *Pseudomonas*  
600 *aeruginosa*. *Phytopathol* **65**: 425-431.
- 601 Clara, F. (1930) A new bacterial leaf disease of tobacco in the Philippines. *Phytopathol*  
602 **20**: 691-706.
- 603 Coleman, S.R., Pletzer, D., and Hancock, R.E.W. (2020a) Contribution of swarming  
604 motility to dissemination in a *Pseudomonas aeruginosa* murine skin abscess  
605 infection model. *J Infect Dis*.
- 606 Coleman, S.R., Blimkie, T., Falsafi, R., and Hancock, R.E.W. (2020b) Multidrug adaptive  
607 resistance of *Pseudomonas aeruginosa* swarming cells. *Antimicrob Agents*  
608 *Chemother* **64**: e01999-01919.
- 609 Correa, C.M.C., Tibana, A., and Filho, P.P.G. (1991) Vegetables as a source of infection  
610 with *Pseudomonas aeruginosa* in a University and Oncology Hospital of Rio de  
611 Janeiro. *J Hosp Infect* **18**: 301-306.
- 612 Curran, B., Morgan, J.A.W., Honeybourne, D., and Dowson, C.G. (2005) Commercial  
613 mushrooms and bean sprouts are a source of *Pseudomonas aeruginosa*. *J Clin*  
614 *Microbiol* **43**: 5830-5831.
- 615 Darby, C., Cosma, C.L., Thomas, J.H., and Manoil, C. (1999) Lethal paralysis of  
616 *Caenorhabditis elegans* by *Pseudomonas aeruginosa*. *PNAS* **96**: 15202-15207.
- 617 DeBritto, S., Gajbar, T.D., Satapute, P., Sundaram, L., Lakshmikantha, R.Y., Jogaiah, S.,  
618 and Ito, S.-i. (2020) Isolation and characterization of nutrient dependent  
619 pyocyanin from *Pseudomonas aeruginosa* and its dye and agrochemical  
620 properties. *Sci Rep* **10**: 1542.
- 621 Doustdar, F., Karimi, F., Abedinyfar, Z., Amoli, F.A., and Goudarzi, H. (2019) Genetic  
622 features of *Pseudomonas aeruginosa* isolates associated with eye infections  
623 referred to Farabi Hospital, Tehran, Iran. *Int Ophthalmol* **39**: 1581-1587.
- 624 Durairaj, K., Velmurugan, P., Park, J.-H., Chang, W.-S., Park, Y.-J., Senthilkumar, P. et al.  
625 (2017) Potential for plant biocontrol activity of isolated *Pseudomonas aeruginosa*  
626 and *Bacillus stratosphericus* strains against bacterial pathogens acting through  
627 both induced plant resistance and direct antagonism. *FEMS Microbiol Lett* **364**:  
628 fnx225.
- 629 Elrod, R.P., and Braun, A.C. (1942) *Pseudomonas aeruginosa*: Its rôle as a plant  
630 pathogen. *J Bacteriol* **44**: 633-645.
- 631 Gao, J., Wang, Y., Wang, C.W., and Lu, B.H. (2014) First report of bacterial root rot of  
632 ginseng caused by *Pseudomonas aeruginosa* in China. *Plant Dis* **98**: 1577-1577.
- 633 Georgescu, M., Gheorghe, I., Curutiu, C., Lazar, V., Bleotu, C., and Chifiriuc, M.-C. (2016)  
634 Virulence and resistance features of *Pseudomonas aeruginosa* strains isolated  
635 from chronic leg ulcers. *BMC Infect Dis* **16**: 1-28.
- 636 Goebel, W., Chakraborty, T., and Krefft, J. (1988) Bacterial hemolysins as virulence  
637 factors. *Antonie van Leeuwenhoek* **54**: 453-463.
- 638 Green, S.K., Schroth, M.N., Cho, J.J., Kominos, S.D., and Vitanza-Jack, V.B. (1974)  
639 Agricultural plants and soil as a reservoir for *Pseudomonas aeruginosa*. *Appl*  
640 *Microbiol* **28**: 987-991.
- 641 Grosso-Becerra, M.-V., González-Valdez, A., Granados-Martínez, M.-J., Morales, E.,  
642 Servín-González, L., Méndez, J.-L. et al. (2016) *Pseudomonas aeruginosa* ATCC

- 643 9027 is a non-virulent strain suitable for mono-rhamnolipids production. *Appl*  
644 *Microbiol Biotechnol* **100**: 9995-10004.
- 645 Gunther, N.W., Nunez, A., Fett, W., and Solaiman, D.K. (2005) Production of rhamnolipids  
646 by *Pseudomonas chlororaphis*, a nonpathogenic bacterium. *Appl Environ*  
647 *Microbiol* **71**: 2288-2293.
- 648 Gupta, V., and Buch, A. (2019) *Pseudomonas aeruginosa* predominates as  
649 multifaceted rhizospheric bacteria with combined abilities of P-solubilization and  
650 biocontrol. *J Pure Appl Microbiol* **13**: 319-328.
- 651 Hall, S., McDermott, C., Anoopkumar-Dukie, S., McFarland, A.J., Forbes, A., Perkins, A.V.  
652 et al. (2016) Cellular effects of pyocyanin, a secreted virulence factor of  
653 *Pseudomonas aeruginosa*. *Toxins* **8**: 236-244.
- 654 Haynes, W.C. (1951) *Pseudomonas aeruginosa*--its characterization and identification.  
655 *Microbiol* **5**: 939-950.
- 656 Heck, L.W., Morihara, K., McRae, W.B., and Miller, E.J. (1986) Specific cleavage of  
657 human type III and IV collagens by *Pseudomonas aeruginosa* elastase. *Infect*  
658 *Immun* **51**: 115-118.
- 659 Holloway, B.W. (1955) Genetic recombination in *Pseudomonas aeruginosa*. *J Gen*  
660 *Microbiol* **13**: 572-581.
- 661 Jaffar-Bandjee, M.C., Lazdunski, A., Bally, M., Carrère, J., Chazalette, J.P., and Galabert,  
662 C. (1995) Production of elastase, exotoxin A, and alkaline protease in sputa  
663 during pulmonary exacerbation of cystic fibrosis in patients chronically infected  
664 by *Pseudomonas aeruginosa*. *J Clin Microbiol* **33**: 924-929.
- 665 Kim, B.S., Lee, J.Y., and Hwang, B.K. (2000) *In vivo* control and *in vitro* antifungal activity  
666 of rhamnolipid B, a glycolipid antibiotic, against *Phytophthora capsici* and  
667 *Colletotrichum orbiculare*. *Pest Manag Sci* **56**: 1029-1035.
- 668 Kim, S.K., Kim, Y.C., Lee, S., Kim, J.C., Yun, M.Y., and Kim, I.S. (2011) Insecticidal activity of  
669 rhamnolipid isolated from *Pseudomonas* sp. EP-3 against green peach aphid  
670 (*Myzus persicae*). *J Agric Food Chem* **59**: 934-938.
- 671 Kirienko, N.V., Cezairliyan, B.O., Ausubel, F.M., and Powell, J.R. (2014) *Pseudomonas*  
672 *aeruginosa* PA14 pathogenesis in *Caenorhabditis elegans*. In *Pseudomonas*  
673 *Methods and Protocols*. Filloux, A., and Ramos, J.-L. (eds). New York, NY: Springer  
674 New York, pp. 653-669.
- 675 Kominos, S.D., Copeland, C.E., Grosiak, B., and Postic, B. (1972) Introduction of  
676 *Pseudomonas aeruginosa* into a hospital via vegetables. *Appl Microbiol* **24**: 567-  
677 570.
- 678 König, B., Jaeger, K.E., Sage, A.E., Vasil, M.L., and König, W. (1996) Role of *Pseudomonas*  
679 *aeruginosa* lipase in inflammatory mediator release from human inflammatory  
680 effector cells (platelets, granulocytes, and monocytes). *Infect Immun* **64**: 3252-  
681 3258.
- 682 Kumar, A., Munder, A., Aravind, R., Eapen, S.J., Tümmler, B., and Raaijmakers, J.M.  
683 (2013) Friend or foe: genetic and functional characterization of plant endophytic  
684 *Pseudomonas aeruginosa*. *Environ Microbiol* **15**: 764-779.
- 685 Kumawat, K.C., Sharma, P., Sirari, A., Singh, I., Gill, B.S., Singh, U., and Saharan, K. (2019)  
686 Synergism of *Pseudomonas aeruginosa* (LSE-2) nodule endophyte with  
687 *Bradyrhizobium* sp. (LSBR-3) for improving plant growth, nutrient acquisition and  
688 soil health in soybean. *World J Microbiol Biotechnol* **35**: 47.
- 689 Lebeda, A., Kudela, V., and Jedlickova, Z. (1984) Pathogenicity of *Pseudomonas*  
690 *aeruginosa* for plants and animals. *Acta Phytopathol Acad Sci Hung* **19**: 271-284.

- 691 Lertcanawanichakul, M., and Sawangnop, S. (2011) A comparison of two methods used  
692 for measuring the antagonistic activity of *Bacillus* Species. *WJST* **5**: 161-171.
- 693 Lo Giudice, A., Brillì, M., Bruni, V., De Domenico, M., Fani, R., and Michaud, L. (2007)  
694 Bacterium–bacterium inhibitory interactions among psychrotrophic bacteria  
695 isolated from Antarctic seawater (Terra Nova Bay, Ross Sea). *FEMS Microbiol Ecol*  
696 **60**: 383-396.
- 697 Lodhi, A.M., Khanzada, M.A., Shahzad, S., Ghaffar, A., and Lévesque, C. (2013)  
698 Prevalence of *Pythium aphanidermatum* in agro-ecosystem of Sindh province of  
699 Pakistan. *Pak J Bot* **45**: 635-642.
- 700 Mahajan-Miklos, S., Tan, M.-W., Rahme, L.G., and Ausubel, F.M. (1999) Molecular  
701 mechanisms of bacterial virulence elucidated using a *Pseudomonas*  
702 *aeruginosa*–*Caenorhabditis elegans* pathogenesis model. *Cell* **96**: 47-56.
- 703 Mahmoud, S.Y., Ziedan, E.-S.H., Farrag, E.S., Kalafalla, R.S., and Ali, A.M. (2016)  
704 Antifungal activity of pyocyanin produced by *Pseudomonas aeruginosa* against  
705 *Fusarium oxysporum* Schlecht phytopathogenic fungi. *Int J PharmTech Res* **9**: 43-  
706 50.
- 707 Martin, F.N., and Loper, J.E. (1999) Soilborne plant diseases caused by *Pythium* spp.:  
708 ecology, epidemiology, and prospects for biological control. *Crit Rev Plant Sci*  
709 **18**: 111-181.
- 710 Mathee, K. (2018) Forensic investigation into the origin of *Pseudomonas aeruginosa*  
711 PA14 — old but not lost. *J Med Microbiol* **67**: 1019-1021.
- 712 Mavrodi, O.V., Mavrodi, D.V., Parejko, J.A., Thomashow, L.S., and Weller, D.M. (2012)  
713 Irrigation differentially impacts populations of indigenous antibiotic-producing  
714 *Pseudomonas* spp. in the rhizosphere of wheat. *Appl Environ Microbiol* **78**: 3214-  
715 3220.
- 716 McClure, C.D., and Schiller, N.L. (1992) Effects of *Pseudomonas aeruginosa* rhamnolipids  
717 on human monocyte-derived macrophages. *J Leukoc Biol* **51**: 97-102.
- 718 McClure, C.D., and Schiller, N.L. (1996) Inhibition of macrophage phagocytosis by  
719 *Pseudomonas aeruginosa* rhamnolipids *in vitro* and *in vivo*. *Curr Microbiol* **33**: 109-  
720 117.
- 721 Michielse, C.b., and Rep, M. (2009) Pathogen profile update: *Fusarium oxysporum*.  
722 *Molecular Plant Pathology* **10**: 311-324.
- 723 Mondal, K.K., Mani, C., Singh, J., Dave, S.R., Tipre, D.R., Kumar, A., and Trivedi, B.M.  
724 (2012) Fruit rot of tinda caused by *Pseudomonas aeruginosa*—A new report from  
725 India. *Plant Dis* **96**: 141-141.
- 726 Moradali, M.F., Ghods, S., and Rehm, B.H.A. (2017) *Pseudomonas aeruginosa* lifestyle: A  
727 paradigm for adaptation, survival, and persistence. *Front Cell Infect Microbiol* **7**:  
728 1-29.
- 729 Nithya, A., and Babu, S. (2017) Prevalence of plant beneficial and human pathogenic  
730 bacteria isolated from salad vegetables in India. *BMC Microbiol* **17**: 64.
- 731 Nixon, G.M., Armstrong, D.S., Carzino, R., Carlin, J.B., Olinsky, A., Robertson, C.F., and  
732 Grimwood, K. (2001) Clinical outcome after early *Pseudomonas aeruginosa*  
733 infection in cystic fibrosis. *J Pediatr* **138**: 699-704.
- 734 O'Toole, G.A. (2011) Microtiter dish biofilm formation assay. *J Viz Exp* **47**: e2437.
- 735 Orlofsky, E., Bernstein, N., Sacks, M., Vonshak, A., Benami, M., Kundu, A. et al. (2016)  
736 Comparable levels of microbial contamination in soil and on tomato crops after  
737 drip irrigation with treated wastewater or potable water. *Agric Ecosyst Environ*  
738 **215**: 140-150.

- 739 Ostroff, R.M., Wretling, B., and Vasil, M.L. (1989) Mutations in the hemolytic-  
740 phospholipase C operon result in decreased virulence of *Pseudomonas*  
741 *aeruginosa* PAO1 grown under phosphate-limiting conditions. *Infect Immun* **57**:  
742 1369-1373.
- 743 Overhage, J., Bains, M., Brazas, M.D., and Hancock, R.E.W. (2008) Swarming of  
744 *Pseudomonas aeruginosa* is a complex adaptation leading to increased  
745 production of virulence factors and antibiotic resistance. *J Bacteriol* **190**: 2671-  
746 2679.
- 747 Parmely, M., Gale, A., Clabaugh, M., Horvat, R., and Zhou, W.W. (1990) Proteolytic  
748 inactivation of cytokines by *Pseudomonas aeruginosa*. *Infect Immun* **58**: 3009-  
749 3014.
- 750 Parmeter, J.R. (1970) *Rhizoctonia solani*, biology and pathology: Univ of California Press.
- 751 Picard, B., Denamur, E., Barakat, A., Elion, J., and Goulet, P. (1994) Genetic  
752 heterogeneity of *Pseudomonas aeruginosa* clinical isolates revealed by esterase  
753 electrophoretic polymorphism and restriction fragment length polymorphism of  
754 the ribosomal RNA gene region. *J Med Microbiol* **40**: 313-322.
- 755 Pinna, A., Usai, D., Sechi, L.A., Molicotti, P., Zanetti, S., and Carta, A. (2008) Detection of  
756 virulence factors in *Pseudomonas aeruginosa* strains isolated from contact lens-  
757 associated corneal ulcers. *Cornea* **27**: 320-326.
- 758 Radford, R., Brahma, A., Armstrong, M., and Tullo, A.B. (2000) Severe sclerokeratitis due  
759 to *Pseudomonas aeruginosa* in non-contact-lens wearers. *Eye* **14**: 3-7.
- 760 Radhapriya, P., Ramachandran, A., Anandham, R., and Mahalingam, S. (2015)  
761 *Pseudomonas aeruginosa* RRALC3 enhances the biomass, nutrient and carbon  
762 contents of *Pongamia pinnata* seedlings in degraded forest soil. *Plos One* **10**:  
763 e0139881.
- 764 Rahme, L.G., Ausubel, F.M., Cao, H., Drenkard, E., Goumnerov, B.C., Lau, G.W. et al.  
765 (2000) Plants and animals share functionally common bacterial virulence factors.  
766 *PNAS* **97**: 8815-8821.
- 767 Reynolds, H.Y., Levine, A.S., Wood, A.E., Zierdt, C.H., Dale, D.C., and E., P. (1975)  
768 *Pseudomonas aeruginosa* infections: Persisting problems and current research to  
769 find new therapies. *Ann Intern Med* **82**: 819-831.
- 770 Riungu, G., Muthomi, J., Narla, R., Wagacha, J., and Gathumbi, J. (2008) Management  
771 of *Fusarium* head blight of wheat and deoxynivalenol accumulation using  
772 antagonistic microorganisms. *Plant Pathol J* **7**: 13-19.
- 773 Römling, U., Fiedler, B., Boßhammer, J., Grothues, D., Greipel, J., von der Hardt, H., and  
774 Tümmler, B. (1994) Epidemiology of chronic *Pseudomonas aeruginosa* infections  
775 in cystic fibrosis. *J Infect Dis* **170**: 1616-1621.
- 776 Rosenthal, V.D., Bat-Erdene, I., Gupta, D., Belkebir, S., Rajhans, P., Zand, F. et al. (2020)  
777 International Nosocomial Infection Control Consortium (INICC) report, data  
778 summary of 45 countries for 2012-2017: Device-associated module. *Am J Infect*  
779 **48**: 423-432.
- 780 Ruiz-Roldán, L., Rojo-Bezares, B., de Toro, M., López, M., Toledano, P., Lozano, C. et al.  
781 (2020) Antimicrobial resistance and virulence of *Pseudomonas* spp. among  
782 healthy animals: concern about exolysin ExlA detection. *Sci Rep* **10**: 11667.
- 783 Sakthivel, N., and Gnanamanickam, S. (1986) Toxicity of *Pseudomonas fluorescens*  
784 towards rice sheath-rot pathogen *Acrocyndrium oryzae* Saw. *Curr Sci* **55**: 106-  
785 107.

- 786 Sancheti, A., and Ju, L.-K. (2019) Eco-friendly rhamnolipid based fungicides for  
787 protection of soybeans from *Phytophthora sojae*. *Pest Manag Sci* **75**: 3031-3038.
- 788 Sarma, R.K., and Saikia, R. (2014) Alleviation of drought stress in mung bean by strain  
789 *Pseudomonas aeruginosa* GGRJ21. *Plant Soil* **377**: 111-126.
- 790 Schroth, M., Cho, J., Green, S., and Kominos, S. (1977) Epidemiology of *Pseudomonas*  
791 *aeruginosa* in agricultural areas. In *Pseudomonas aeruginosa: Ecological aspects*  
792 *and patient colonization*. Young, V. (ed): New York: Raven Press, pp. 1-29.
- 793 Schroth, M.N., Cho, J.J., Green, S.K., Kominos, S.D., and Publishing, M.S. (2018)  
794 Epidemiology of *Pseudomonas aeruginosa* in agricultural areas. *J Med Microbiol*  
795 **67**: 1191-1201.
- 796 Siegmund, I., and Wagner, F. (1991) New method for detecting rhamnolipids excreted  
797 by *Pseudomonas* species during growth on mineral agar. *Biotechnol Tech* **5**: 265-  
798 268.
- 799 Singh, P.K., Schaefer, A.L., Parsek, M.R., Moninger, T.O., Welsh, M.J., and Greenberg, E.P.  
800 (2000) Quorum-sensing signals indicate that cystic fibrosis lungs are infected with  
801 bacterial biofilms. *Nature* **407**: 762-764.
- 802 Slekovec, C., Plantin, J., Cholley, P., Thouverez, M., Talon, D., Bertrand, X., and Hocquet,  
803 D. (2012) Tracking down antibiotic-resistant *Pseudomonas aeruginosa* isolates in  
804 a wastewater network. *PLOS One* **7**: e49300-e49300.
- 805 Sudhakar, T., Karpagam, S., and Premkumar, J. (2015) Biosynthesis, antibacterial activity  
806 of pyocyanin pigment produced by *Pseudomonas aeruginosa* SU1. *J Chem*  
807 *Pharm Res* **7**: 921-924
- 808 Swings, J., Van Den Mooter, M., Vauterin, L., Hoste, B., Gillis, M., Mew, T.W., and Kersters,  
809 K. (1990) Reclassification of the causal agents of bacterial blight (*Xanthomonas*  
810 *campestris* pv. *oryzae*) and bacterial leaf streak (*Xanthomonas campestris* pv.  
811 *oryzicola*) of rice as pathovars of *Xanthomonas oryzae* (ex Ishiyama 1922) sp.  
812 nov., nom. rev. *Int J Syst Evol Micr* **40**: 309-311.
- 813 Tan, M.-W., Mahajan-Miklos, S., and Ausubel, F.M. (1999) Killing of *Caenorhabditis*  
814 *elegans* by *Pseudomonas aeruginosa* used to model mammalian bacterial  
815 pathogenesis. *PNAS* **96**: 715-720.
- 816 Tank, N., and Saraf, M. (2010) Salinity-resistant plant growth promoting rhizobacteria  
817 ameliorates sodium chloride stress on tomato plants. *J Plant Interact* **5**: 51-58.
- 818 Tate, D., Mawer, S., and Newton, A. (2003) Outbreak of *Pseudomonas aeruginosa*  
819 folliculitis associated with a swimming pool inflatable. *Epidemiol Infect* **130**: 187-  
820 192.
- 821 Tiwari, P., and Singh, J.S. (2017) A plant growth promoting rhizospheric *Pseudomonas*  
822 *aeruginosa* strain inhibits seed germination in *Triticum aestivum* (L) and *Zea mays*  
823 (L). *Microbiol Res* **8**: 7233.
- 824 Tremblay, J., and Déziel, E. (2008) Improving the reproducibility of *Pseudomonas*  
825 *aeruginosa* swarming motility assays. *J Basic Microbiol* **48**: 509-515.
- 826 Tremblay, J., and Déziel, E. (2010) Gene expression in *Pseudomonas aeruginosa*  
827 swarming motility. *BMC Genomics* **11**: 587.
- 828 Viswanathan, P., and Kaur, R. (2001) Prevalence and growth of pathogens on salad  
829 vegetables, fruits and sprouts. *Int J Hyg Environ Health* **203**: 205-213.
- 830 Vives-Flórez, M., and Garnica, D. (2006) Comparison of virulence between clinical and  
831 environmental *Pseudomonas aeruginosa* isolates. *Int Microbiol* **9**: 247-252.
- 832 Von Graevenitz, A. (1977) The role of opportunistic bacteria in human disease. *Annu*  
833 *Rev Microbiol* **31**: 447-471.

- 834 Wargo, M.J., Gross, M.J., Rajamani, S., Allard, J.L., Lundblad, L.K.A., Allen, G.B. et al.  
835 (2011) Hemolytic phospholipase c inhibition protects lung function during  
836 *Pseudomonas aeruginosa* infection. *Am J Respir Crit Care Med* **184**: 345-354.
- 837 Wheater, D.W.F., Mara, D.D., Jawad, L., and Oragui, J. (1980) *Pseudomonas aeruginosa*  
838 and *Escherichia coli* in sewage and fresh water. *Water Res* **14**: 713-721.
- 839 Williams, R.E., and Harper, G.J. (1947) Staphylococcal haemolysins on sheep-blood agar  
840 with evidence for a fourth haemolysin. *J Pathol Bacteriol* **59**: 69-78.
- 841 Wright, C., Kominos, S.D., and Yee, R.B. (1976) *Enterobacteriaceae* and *Pseudomonas*  
842 *aeruginosa* recovered from vegetable salads. *Appl Environ Microbiol* **31**: 453-454.
- 843 Yan, F., Xu, S., Guo, J., Chen, Q., Meng, Q., and Zheng, X. (2015) Biocontrol of post-  
844 harvest *Alternaria alternata* decay of cherry tomatoes with rhamnolipids and  
845 possible mechanisms of action. *J Sci Food Agric* **95**: 1469-1474.
- 846 Yasmin, S., Hafeez, F.Y., and Rasul, G. (2014) Evaluation of *Pseudomonas aeruginosa* Z5  
847 for biocontrol of cotton seedling disease caused by *Fusarium oxysporum*.  
848 *BioControl Sci Techn* **24**: 1227-1242.
- 849 Zhang, Y., and Miller, R.M. (1992) Enhanced octadecane dispersion and  
850 biodegradation by a *Pseudomonas* rhamnolipid surfactant (biosurfactant). *Appl*  
851 *Environ Microbiol* **58**: 3276-3282.
- 852 Zulianello, L., Canard, C., Köhler, T., Caille, D., Lacroix, J.-S., and Meda, P. (2006)  
853 Rhamnolipids are virulence factors that promote early infiltration of primary  
854 human airway epithelia by *Pseudomonas aeruginosa*. *Infect Immun* **74**: 3134-  
855 3147.



**Table 1. Microbial strains used in this study**

| <b>Microorganism</b>                                     | <b>Source</b> | <b>Infection/Niche</b> | <b>References</b>       |
|----------------------------------------------------------|---------------|------------------------|-------------------------|
| <b><i>Pseudomonas aeruginosa</i> (reference strains)</b> |               |                        |                         |
| PAO1                                                     | Human         | Wound infection        | Holloway, (1955)        |
| ATCC9027                                                 | Human         | Otitis externa         | Haynes, (1951)          |
| ATCC10145                                                | Human         | Unknown                | Picard et al. (1994)    |
| <b>Plant-associated <i>P. aeruginosa</i> strains</b>     |               |                        |                         |
| PPA01                                                    | Cucumber      | Rhizosphere            | Ambreetha et al. (2021) |
| PPA02                                                    | Cucumber      | Rhizosphere            | Ambreetha et al. (2021) |
| PPA03                                                    | Cucumber      | Endophyte              | Ambreetha et al. (2021) |
| PPA04                                                    | Cucumber      | Rhizosphere            | Ambreetha et al. (2021) |
| PPA05                                                    | Tomato        | Endophyte              | Ambreetha et al. (2021) |
| PPA06                                                    | Tomato        | Rhizosphere            | Ambreetha et al. (2021) |
| PPA07                                                    | Tomato        | Endophyte              | Ambreetha et al. (2021) |
| PPA08                                                    | Tomato        | Endophyte              | Ambreetha et al. (2021) |
| PPA09                                                    | Tomato        | Rhizosphere            | Ambreetha et al. (2021) |
| PPA10                                                    | Tomato        | Endophyte              | Ambreetha et al. (2021) |
| PPA11                                                    | Eggplant      | Endophyte              | Ambreetha et al. (2021) |
| PPA12                                                    | Eggplant      | Rhizosphere            | Ambreetha et al. (2021) |
| PPA13                                                    | Eggplant      | Rhizosphere            | Ambreetha et al. (2021) |
| PPA14                                                    | Eggplant      | Rhizosphere            | Ambreetha et al. (2021) |
| PPA15                                                    | Chili         | Rhizosphere            | Ambreetha et al. (2021) |
| PPA16                                                    | Chili         | Endophyte              | Ambreetha et al. (2021) |
| PPA17                                                    | Chili         | Endophyte              | Ambreetha et al. (2021) |
| PPA18                                                    | Chili         | Endophyte              | Ambreetha et al. (2021) |
| <b>Phytopathogens</b>                                    |               |                        |                         |
| <i>Xanthomonas oryzae</i>                                | -             | -                      | Unpublished             |
| <i>Pythium aphanidermatum</i>                            | -             | -                      | Unpublished             |
| <i>Rhizoctonia solani</i>                                | -             | -                      | Unpublished             |
| <i>Fusarium oxysporum</i>                                | -             | -                      | Unpublished             |

**Table 2. Lytic behavior of *P. aeruginosa* strains**

| Strains   | Hemolysis           |                     | Proteolysis |         | Lipolysis |
|-----------|---------------------|---------------------|-------------|---------|-----------|
|           | $\gamma$ -hemolysis | $\alpha$ -hemolysis | Casein      | Gelatin | Lipid     |
| PPA01     | +                   | -                   | -           | -       | -         |
| PPA02     | -                   | ++                  | +           | -       | -         |
| PPA03     | -                   | ++                  | ++          | ++      | -         |
| PPA04     | -                   | ++                  | +           | ++      | -         |
| PPA05     | -                   | -                   | +           | ++      | -         |
| PPA06     | +                   | -                   | +           | -       | +         |
| PPA07     | -                   | ++                  | ++          | ++      | +         |
| PPA08     | -                   | ++                  | ++          | ++      | -         |
| PPA09     | +                   | -                   | -           | -       | -         |
| PPA10     | -                   | ++                  | ++          | ++      | -         |
| PPA11     | -                   | ++                  | +           | ++      | -         |
| PPA12     | +                   | -                   | +           | -       | -         |
| PPA13     | -                   | ++                  | ++          | ++      | +         |
| PPA14     | -                   | ++                  | ++          | ++      | -         |
| PPA15     | +                   | -                   | ++          | ++      | +         |
| PPA16     | -                   | ++                  | ++          | ++      | -         |
| PPA17     | +                   | -                   | ++          | ++      | -         |
| PPA18     | +                   | -                   | ++          | ++      | -         |
| ATCC10145 | -                   | ++                  | ++          | ++      | +         |
| ATCC9027  | -                   | ++                  | -           | +       | -         |
| PAO1      | -                   | ++                  | ++          | ++      | ++        |

$\gamma$ -hemolysis – no lysis of blood cells;  $\alpha$ -hemolysis - partial destruction of blood cells; '+'- mild lysis; '++' – extensive lysis; '-' – no lysis

Fig. 1

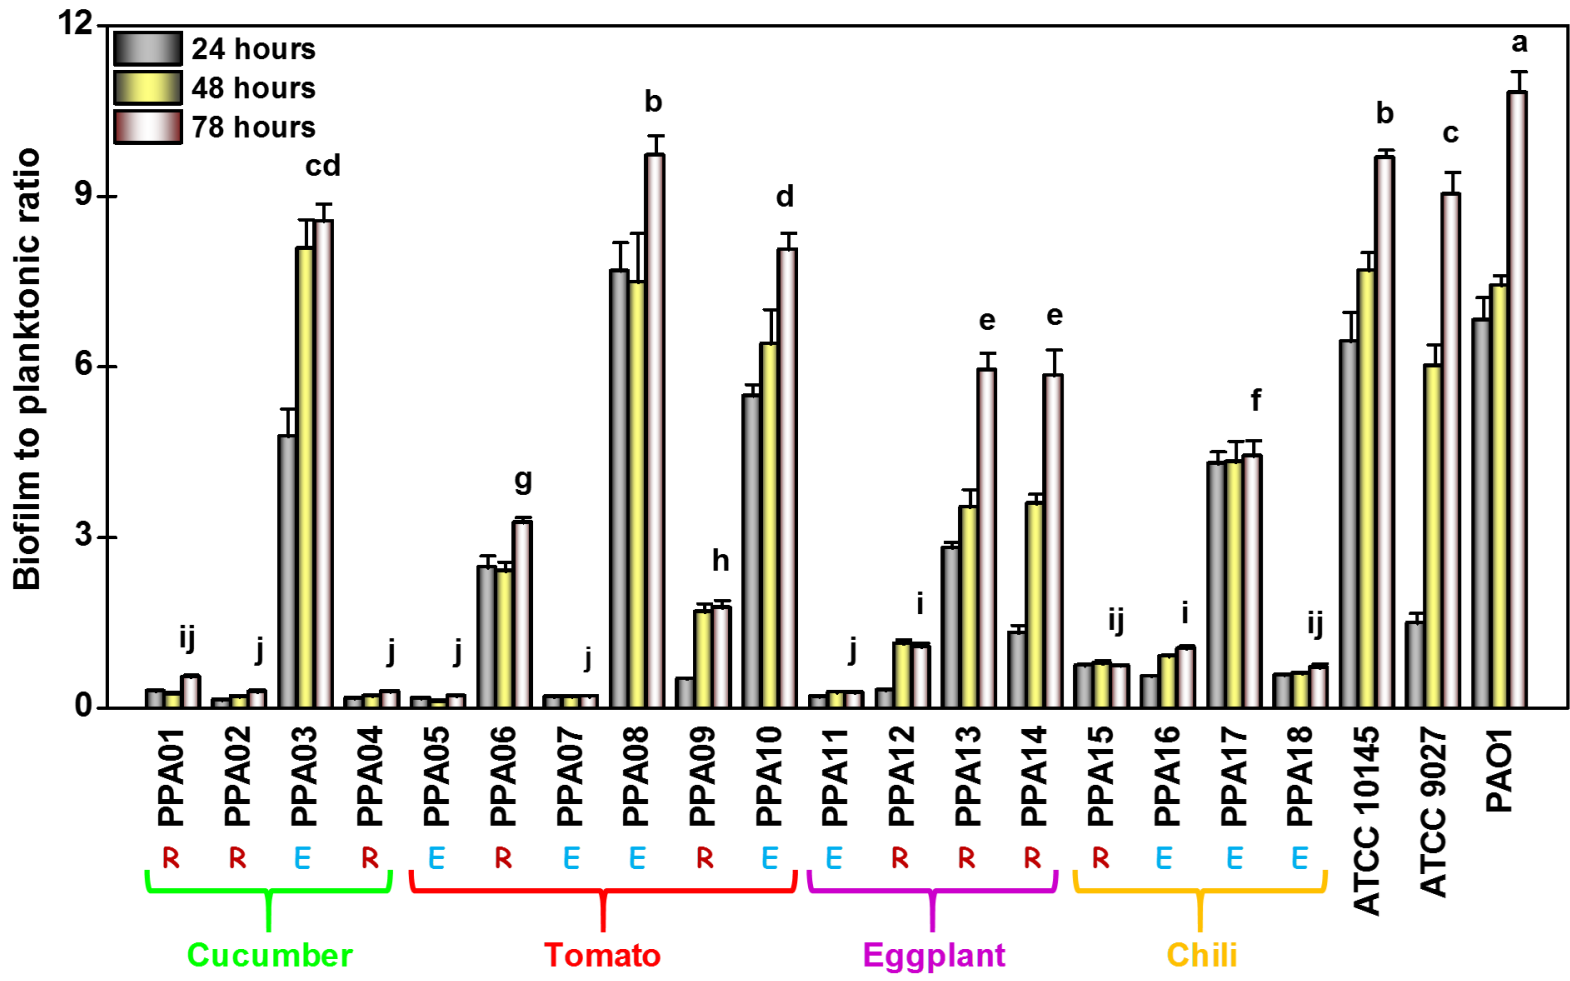

**Fig. 2**

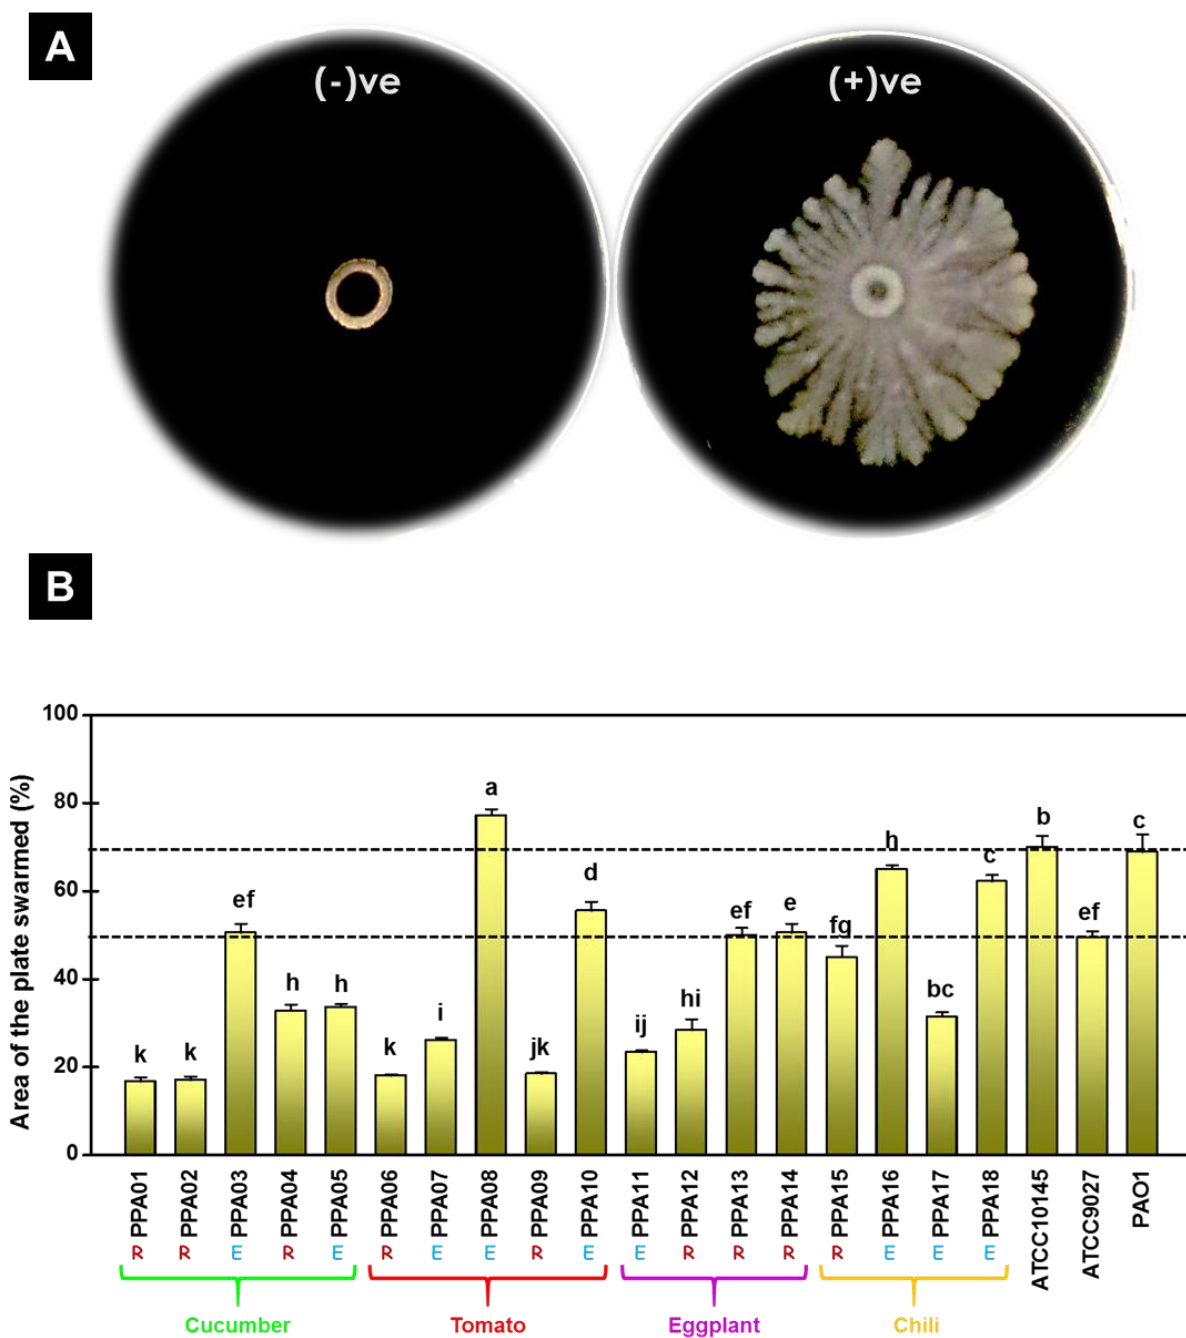

**Fig. 3**

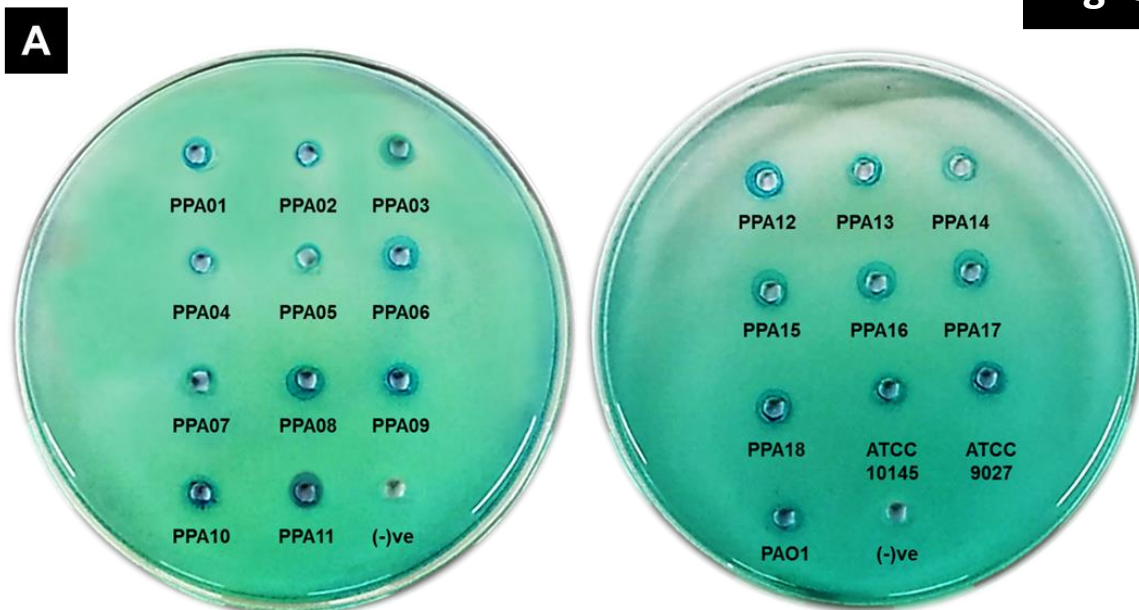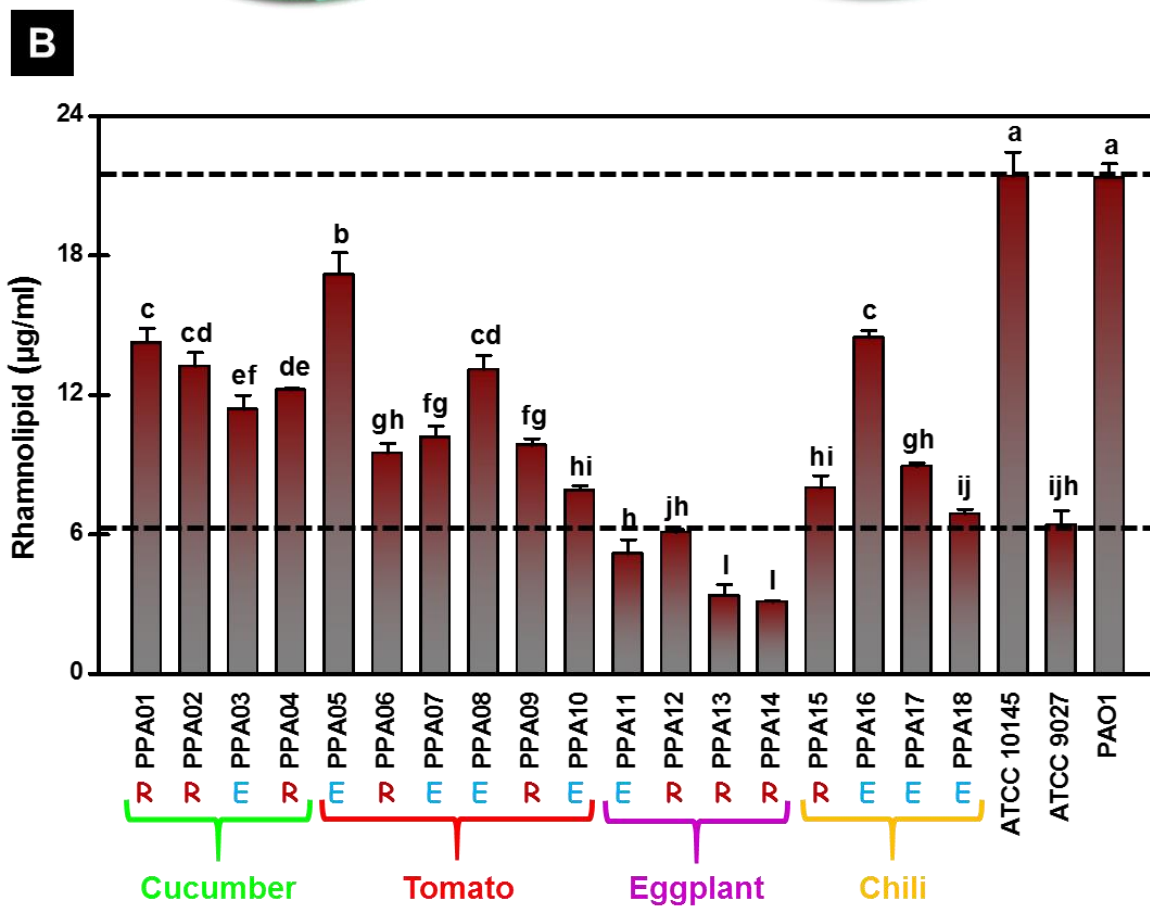

**Fig. 4**

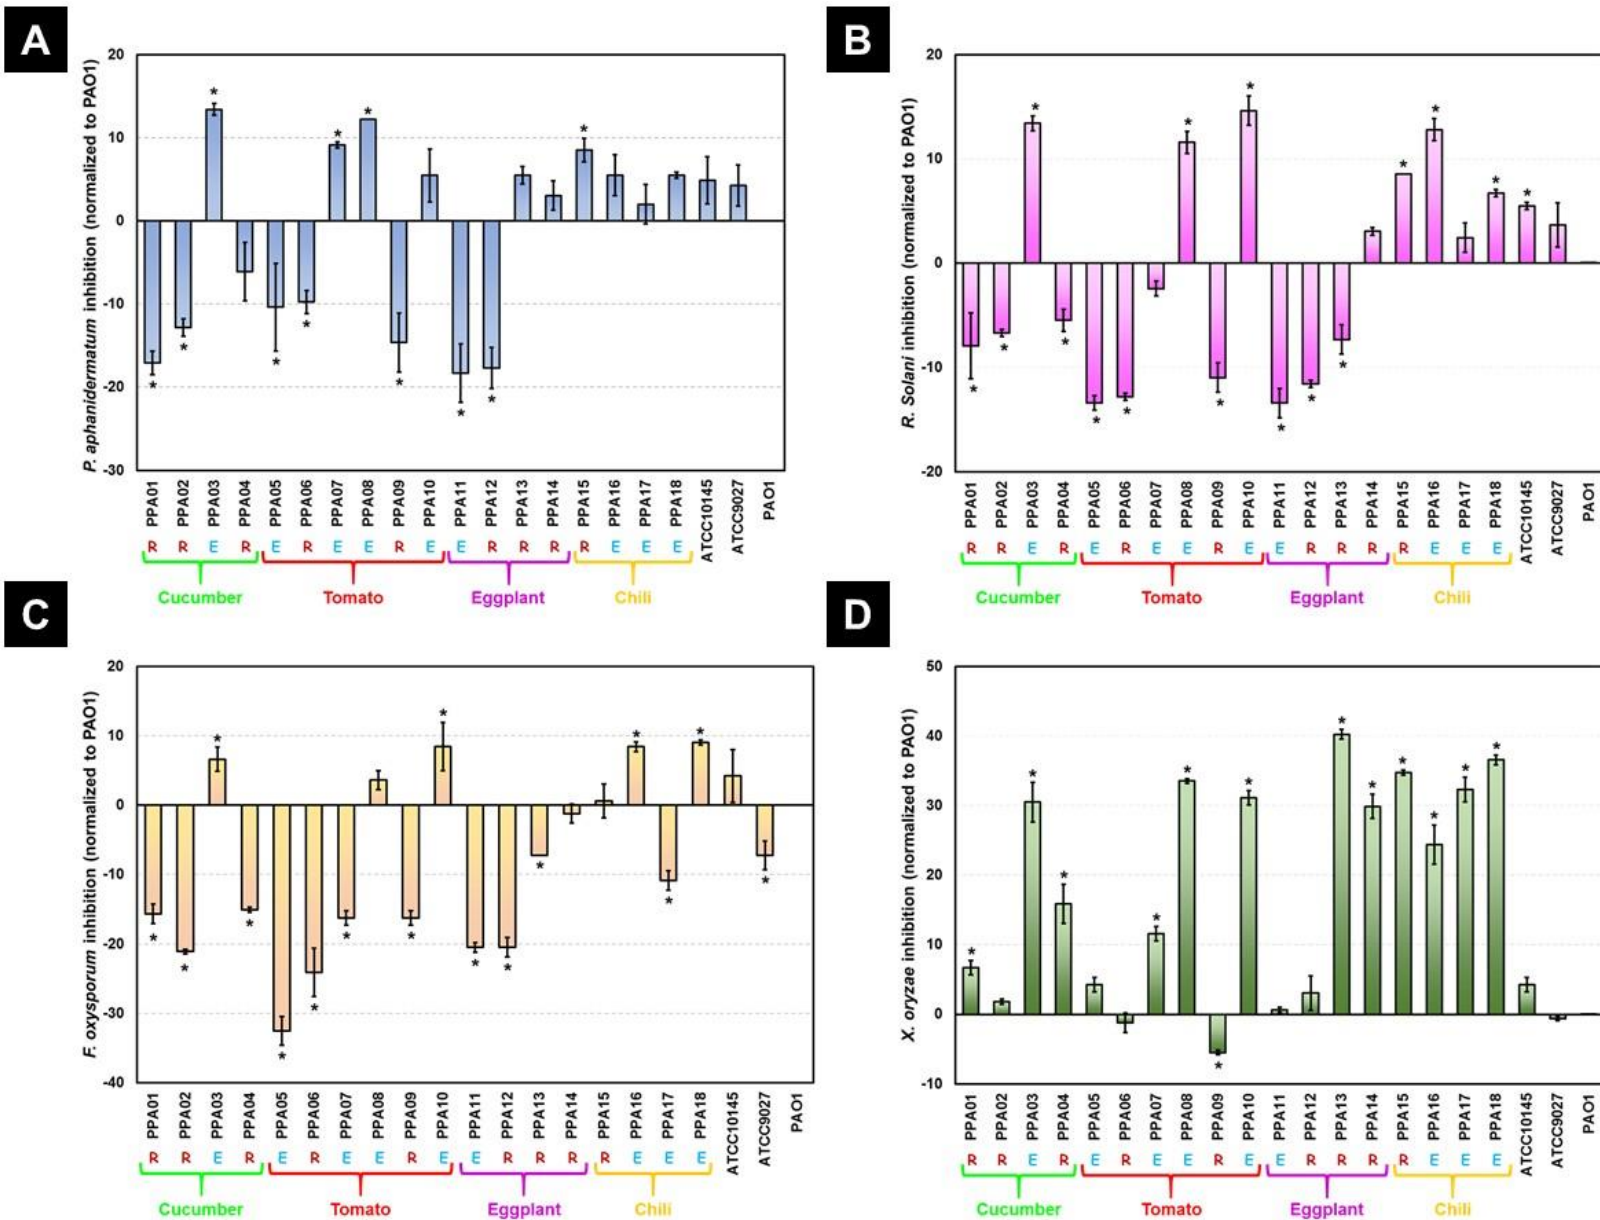

Fig. 5

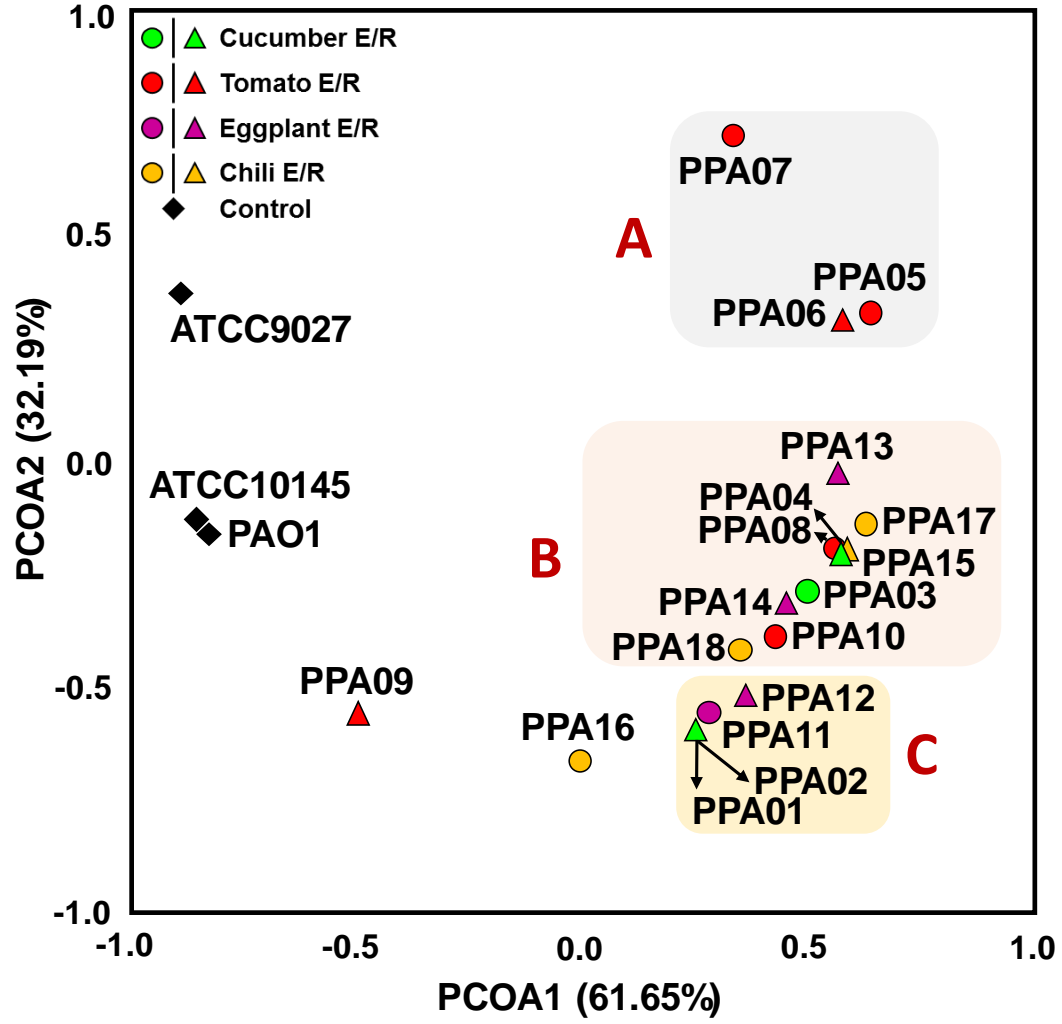

**Fig. 6**

**A**

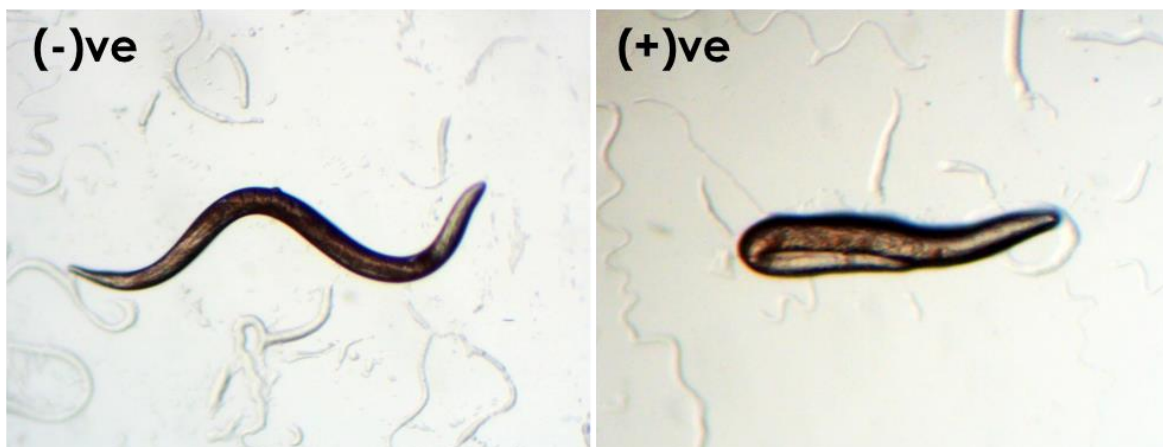

**B**

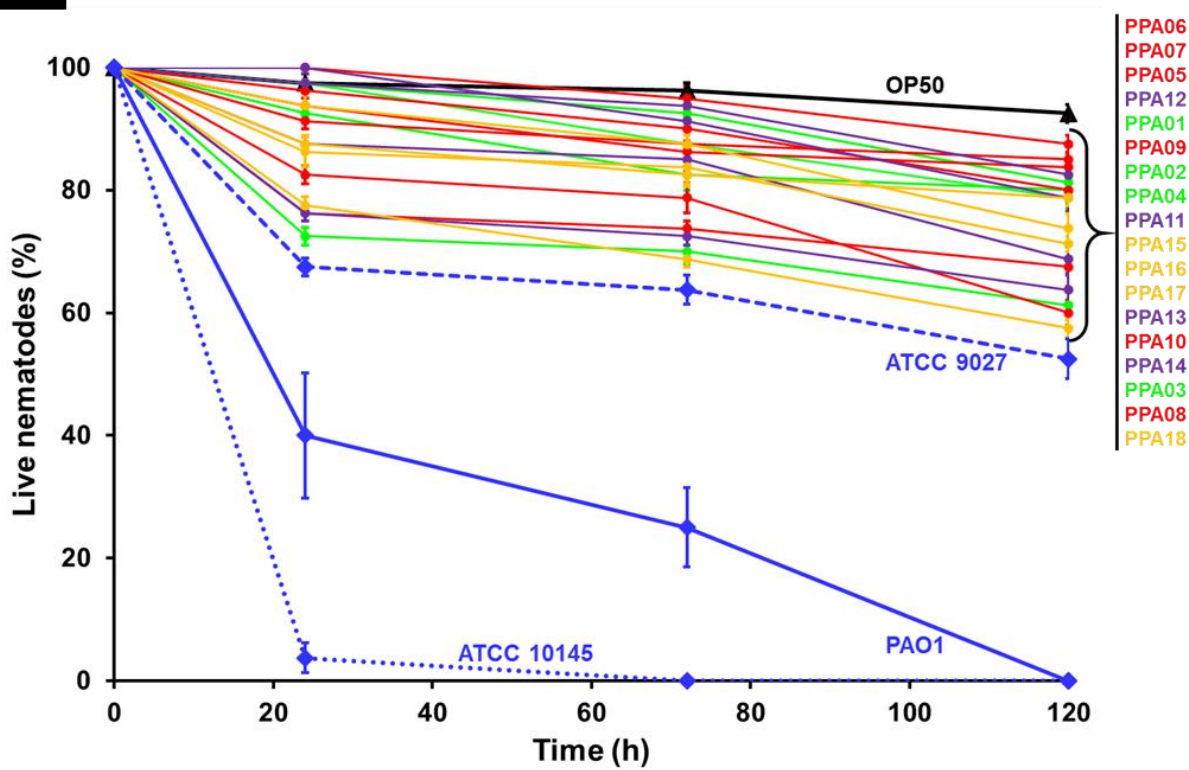



## Figure legends

**Fig. 1. Biofilm production by *P. aeruginosa* strains.** The graph represents the biofilm to the planktonic ratio of *P. aeruginosa* strains recorded after 24, 48, and 72 h of incubation. Values plotted are the mean of six replicates with standard errors and letters above the bars indicating the ranking of the strains (significant differences,  $p < 0.05$ ) based on Duncan's multiple range test (DMRT). The strains are color-coded based on their plant source: cucumber (green), tomato (red), eggplant (purple), and chili (yellow). The clinical isolates, ATCC10145, ATCC9027, and PAO1 are positive controls. R, rhizosphere strain; E, endophytic strain.

**Fig. 2. Swarming motility by *P. aeruginosa* strains.** (A) Visualization of a non-swarming negative control, *P. chlororaphis* (left), and a superior swarmer, *P. aeruginosa* (PPA08/tomato endophyte), on M9 plates with 0.5% agar. (B) The graph represents the percentage of 90mm Petri-plates covered by the tendrils formed by the *P. aeruginosa* strains during swarming. Values plotted are the mean of six replicates with the standard errors and letters above the bars indicating the ranking of strains (significant differences ( $p < 0.05$ ) based on Duncan's multiple range test (DMRT). The strains are color-coded based on their plant source: cucumber (green), tomato (red), eggplant (purple), and chili (yellow). The clinical isolates, ATCC10145, ATCC9027, and PAO1, are positive controls. R, rhizosphere strain; E, endophytic strain.

**Fig. 3. Rhamnolipid production by *P. aeruginosa* strains.** (A) Rhamnolipid production is indicated by the appearance of blue halos around the wells upon addition of cell-free supernatant of *P. aeruginosa* strains on CTAB-methylene blue agar medium. (B) Quantitative rhamnolipid levels released by *P. aeruginosa* strains. Values plotted are the mean of three replicates with the standard errors and letters above the bars indicating the ranking of the strains (significant differences ( $p < 0.05$ ) based on Duncan's multiple range test (DMRT). The strains are color-coded based on their plant source: cucumber (green), tomato (red), eggplant (purple), and chili (yellow). The dashed lines indicate the levels of rhamnolipid made by the clinical strains, ATCC10145, ATCC9027, and PAO1 (positive controls). R, rhizosphere strain; E, endophytic strain.

**Fig 4. Biocontrol of phytopathogens by *P. aeruginosa* strains.** The percentage inhibition of *Pythium aphanidermatum* (A), *Rhizoctonia solani* (B), *Fusarium oxysporum* (C), and *Xanthomonas oryzae* (D) induced by the *P. aeruginosa* strains. Values plotted are the mean of three replicates normalized to PAO1. \* denotes the significant difference of PAO1 ( $p < 0.05$ ) based on Duncan's multiple range test (DMRT). Strains are color-coded based on their plant source: cucumber (green), tomato (red), eggplant (purple), and chili (yellow). R, rhizosphere strains; E, endophytic strain.

**Fig. 5. Principal coordinate analysis (PCoA) based on biocontrol ability of the *P. aeruginosa* strains.** Euclidean distance-based PCoA plot for the biocontrol of bacterial and fungal phytopathogens by the *P. aeruginosa* strains. The percentage values in parentheses on the x- (PCoA1) and y-axes (PCoA2) depict the similarities and differences among the strains based on their mineral solubilizing ability. The three major clusters of PPA strains formed based on their similar biocontrol activity are named A, B, and C. The strains are color-coded based on their plant source: cucumber (green), tomato (red), eggplant (purple), and chili (yellow).

**Fig. 6. *Caenorhabditis elegans* death induced by *P. aeruginosa* strains.** (A) Stereomicroscopic view of L4 nematodes - live and active worm after feeding on *E. coli* OP50 (left); dead worm after feeding on the most virulent clinical isolate, ATCC 10145 (right). (B) Percentage of living nematodes after feeding on *P. aeruginosa* strains recorded over the time course of 0-120 hours. Values plotted are the means of three replicates with standard errors. The blue lines indicate the percentage of nematodes that survived after feeding on the clinical isolates, ATCC10145, ATCC9027, and PAO1 (positive controls). The black line indicates the percentage of living nematodes after feeding on *E. coli* OP50 (negative control). The PPA strains are color-coded based on their plant source: cucumber (green), tomato (red), eggplant (purple), and chili (yellow).
